# Supplementary material for: Multi-task scattering-model classification and parameter regression of nanostructures from small-angle scattering data
Source: Royal Society of Chemistry journal article supplement (doi:10.1039/d3dd00225j), 2024-01-01
Supplement: d3dd00225j1.pdf [file d3dd00225j1.pdf]

# Supplementary Information: Multi-Task Scattering-Model Classification and Parameter Regression of Nanostructures from Small-Angle Scattering Data

Batuhan Yildirim,<sup>abc</sup> James Douth,<sup>b</sup> and Jacqueline M. Cole<sup>\*abc</sup>

## Implementation and Training Details

### Input Embeddings

Before being processed by the encoder, the discretized log-quotient transformed  $I(q)$  (of sequence length  $S$  and 256 bins),  $\{\mathbf{x} \in \mathbb{Z}^S \mid 0 \leq x_i < 256\}$ , is tokenized and position encoded.

In tokenizing an  $I(q)$  sequence, we bin the intensity values globally across all  $q$ -values and assign a unique  $F = 1024$  dimensional vector to each bin. These unique vectors are initialized by randomly sampling them from a unit Gaussian distribution then projecting with a learned transformation,

$$\mathbf{t}_i = \mathbf{W}_e \mathbf{t}_i^0, \mathbf{t}_i^0 \sim \mathcal{N}(\mathbf{0}, \mathbf{I}), \quad (1)$$

where  $\mathbf{W}_e$  is the embedding projection matrix and  $\mathbf{t}_i^0$  and  $\mathbf{t}_i$  are the initialized and projected token vectors, respectively. The tokens representing the binned  $I(q)$  values at each sequence index are stacked to create a token matrix  $\mathbf{T} \in \mathbb{R}^{S \times F}$ . Positional embeddings<sup>1</sup> assign a fixed sinusoidal embedding to the sequence index of each  $q$ -value. These are fixed sine and cosine vectors whose frequencies depend on the index of the  $q$ -value they correspond to. Similar to the tokenized  $I(q)$  matrix, these are stacked along the sequence dimension to create a position embedding matrix,  $\mathbf{P} \in \mathbb{R}^{S \times F}$ . The input embedding  $\mathbf{X}$  is the sum of the tokenized and positional embeddings,

$$\mathbf{X} = \mathbf{T} + \mathbf{P}. \quad (2)$$

Including  $\mathbf{P}$  in the input embedding allows the model to make use of information about the absolute and relative positions of different values in the input sequence. This is necessary when modeling sequences as transformers are invariant to permutations in the sequence dimension and simply express output tokens as a weighted linear combination of all input tokens. Hence there are no natural sequential or spatial inductive biases built into the architecture such as in recurrent and convolutional neural networks.

### Multitask Objective Function

The objective function is constructed as follows. The scattering-model classification loss for a single instance is defined as

$$\mathcal{L}_{\text{clf}} = \sum_{k=1}^K m_k \log p(\hat{m}_k), \quad (3)$$

where  $K$  is the number of scattering-model classes in the training dataset,  $p(\hat{m}_k)$  is the predicted probability that an input belongs to the  $k$ th scattering-model class, and  $m_k$  is the ground-truth which equals one for the correct scattering-model class and zero otherwise. The scattering-model parameter regression loss for a single instance is defined as

$$\mathcal{L}_{\text{reg}} = \frac{1}{R} \sum_{j=1}^R (y_j - \hat{y}_j)^2, \quad (4)$$

where  $R$  is the number of scattering-model parameters in the training dataset,  $\hat{y}_j$  is the predicted value of the  $j$ th scattering-model parameter, and  $y_j$  is the corresponding ground-truth value. The index  $j$  in the regression loss spans all scattering-model parameters across all model classes in the training data. As a result, the regression decoder predicts all parameters in the training data for a given input. To deal with this during training, a given  $y$  has all parameter values that do not correspond to its scattering-model class set to NaN. When calculating the regression loss for a single instance, we take the mean over the non-NaN values in  $y$ , meaning that the predictions that correspond to the NaN values in the ground truth do not contribute to parameter updates during back-propagation of gradients in the neural network. Finally, the overall objective, averaged over many instances, is

$$L = \frac{1}{N} \sum_{i=1}^N \lambda_{\text{clf}} \mathcal{L}_{\text{clf}} + \lambda_{\text{reg}} \mathcal{L}_{\text{reg}}, \quad (5)$$

where  $N$  is the number of training samples in a batch during training or the total number of samples in the validation or test datasets.  $\lambda_{\text{clf}}$  and  $\lambda_{\text{reg}}$  are hyperparameters that control the weighting of the classification and regression terms of the objective function. We used values of 1.0 for both of these terms.

### Model Hyperparameters

Table 1 Encoder hyperparameters.

|                            |      |
|----------------------------|------|
| latent dim.                | 1024 |
| num. latents               | 48   |
| dropout                    | 0.05 |
| cross att. widening factor | 1    |
| cross att. heads           | 4    |
| self att. blocks           | 12   |
| self att. widening factor  | 1    |
| self att. heads            | 4    |

<sup>a</sup> Cavendish Laboratory, Department of Physics, University of Cambridge, J.J. Thomson Avenue, Cambridge, CB3 0HE, United Kingdom

<sup>b</sup> ISIS Neutron and Muon Source, STFC Rutherford Appleton Laboratory, Didcot, Oxfordshire, OX11 0QX, United Kingdom

<sup>c</sup> Research Complex at Harwell, Rutherford Appleton Laboratory, Didcot, Oxfordshire, OX11 0FA, United Kingdom

\* Corresponding author

Table 2 Scattering-model decoder hyperparameters.

|                 |      |
|-----------------|------|
| dropout         | 0.45 |
| num. heads      | 4    |
| widening factor | 3    |

Table 3 Scattering-model parameter decoder hyperparameters.

|                 |      |
|-----------------|------|
| dropout         | 0.05 |
| num. heads      | 2    |
| widening factor | 1    |

### Training Details

We trained for 200 epochs with a batch size of 1834 using the AdamW<sup>2,3</sup> optimizer with a learning rate of 5e-3 and a weight decay of 1e-7. A linear learning rate warm up schedule was applied for 20 epochs, before decaying it to 10% of the original learning rate using a cosine annealing schedule<sup>4</sup> over the remaining epochs.

### Evaluation Details

#### Classification Metrics

##### Accuracy

The number of correctly classified instances divided by the total number of instances.

##### Top-3 Accuracy

SASformer outputs a categorical probability distribution over scattering-model classes. If the three largest probabilities in this distribution, which correspond to scattering model classes, contain the ground-truth scattering-model class, we count this instance as correctly classified. Top-3 accuracy is then computed the same as accuracy, where the only difference is the criteria for being correctly classified.

#### Regression Metrics

##### Mean Absolute Error

Mean absolute error (MAE) is defined as

$$\text{MAE} = \frac{1}{N} \sum_{i=1}^N |y_i - \hat{y}_i|, \quad (6)$$

where  $y_i$  is the ground-truth value and  $\hat{y}_i$  is the prediction for the  $i$ th scattering-model parameter. MAE is a useful error metric since it preserves units, meaning the error can be interpreted in the units of the prediction and target values.

##### Mean Absolute Percentage Error

Mean absolute percentage error (MAPE) is defined as

$$\text{MAPE} = \frac{1}{N} \sum_{i=1}^N \frac{|y_i - \hat{y}_i|}{y_i}. \quad (7)$$

It is a unitless quantity and has the advantage that MAPE values can be compared between different scattering-model parameters.

#### Coefficient of Determination ( $R^2$ )

$R^2$  is defined as

$$R^2 = 1 - \frac{\text{MSE}(y, \hat{y})}{\text{Var}(y)}, \quad (8)$$

where  $\text{MSE}(y, \hat{y}) = \frac{1}{N} \sum_{i=1}^N (y_i - \hat{y}_i)^2$  is the mean-squared error between the prediction and the target, and  $\text{Var}(y)$  is the variance of the target variable. It explains the fraction of the variance in the target variable ( $y$ ) explained by the regression.

#### k-Nearest Neighbors Classification Baseline Results

We used the k-nearest neighbors (kNN) algorithm as a baseline for the scattering-model classification task. Using the same training and test sets as for SASformer, we used scikit-learn’s implementation of kNN with  $k = 5$  to predict the model classes. Averaged over all scattering-model classes, accuracy and top-3 accuracy are 0.713 and 0.857, respectively. Full results showing the classification accuracy and top-3 accuracy for each scattering-model are shown in Table 4.

Table 4 Classification accuracy and top-3 accuracy of the kNN baseline on the SAS-55m-20k test set. Both metrics range between 0 and 1. Arrows in column headers indicate whether higher or lower is better.

| Scattering Model              | Acc ↑ | Top 3 Acc ↑ | Scattering Model          | Acc ↑ | Top 3 Acc ↑ |
|-------------------------------|-------|-------------|---------------------------|-------|-------------|
| Adsorbed layer                | 0.994 | 0.998       | Lamellar stack paracryst. | 0.894 | 0.967       |
| Binary hard sphere            | 0.306 | 0.427       | Linear pearls             | 0.687 | 0.972       |
| Broad peak                    | 0.971 | 0.992       | Lorentz                   | 1.0   | 1.0         |
| Core multi shell              | 0.135 | 0.254       | Mass fractal              | 0.999 | 1.0         |
| Core shell bicelle            | 0.272 | 0.42        | Mass surface fractal      | 1.0   | 1.0         |
| Core shell cylinder           | 0.262 | 0.46        | Mono Gauss coil           | 0.933 | 0.992       |
| Core shell ellipsoid          | 0.473 | 0.632       | Multilayer vesicle        | 0.878 | 0.943       |
| Core shell sphere             | 0.279 | 0.485       | Onion                     | 0.22  | 0.558       |
| Correlation length            | 0.999 | 1.0         | Parallelepiped            | 0.581 | 0.81        |
| Cylinder                      | 0.284 | 0.544       | Peak Lorentz              | 0.892 | 0.969       |
| Dab                           | 1.0   | 1.0         | Pearl necklace            | 0.815 | 0.987       |
| Ellipsoid                     | 0.444 | 0.68        | Poly Gauss coil           | 0.89  | 0.978       |
| Elliptical cylinder           | 0.377 | 0.668       | Polymer excl volume       | 0.96  | 0.99        |
| Flexible cylinder             | 0.334 | 0.6         | Porod                     | 1.0   | 1.0         |
| Flexible cylinder elliptical  | 0.992 | 0.995       | Power law                 | 1.0   | 1.0         |
| Fractal                       | 0.823 | 0.95        | Raspberry                 | 0.898 | 0.946       |
| Fractal core shell            | 0.659 | 0.819       | Rectangular prism         | 0.428 | 0.778       |
| Fuzzy sphere                  | 0.462 | 0.787       | Sphere                    | 0.389 | 0.814       |
| Gauss Lorentz gel             | 0.818 | 0.952       | Stacked disks             | 0.764 | 0.923       |
| Gaussian peak                 | 0.977 | 0.988       | Star polymer              | 0.994 | 1.0         |
| Gel fit                       | 0.787 | 0.94        | Surface fractal           | 0.965 | 0.991       |
| Guinier                       | 1.0   | 1.0         | Teubner strey             | 0.894 | 0.972       |
| Hollow cylinder               | 0.334 | 0.679       | Triaxial ellipsoid        | 0.497 | 0.806       |
| Hollow rect. prism thin walls | 0.826 | 0.944       | Two Lorentzian            | 0.958 | 0.984       |
| Lamellar                      | 0.926 | 0.994       | Two power law             | 0.899 | 0.953       |
| Lamellar hg                   | 0.774 | 0.9         | Unified power rg          | 0.932 | 0.992       |
| Lamellar hg stack caille      | 0.513 | 0.826       | Vesicle                   | 0.175 | 0.994       |
| Lamellar stack caille         | 0.628 | 0.874       | -                         | -     | -           |

### Scattering-Model Parameter Regression Results

Table 5 Scattering-model parameter regression results part 1 of 4. MAE is the mean absolute error;  $AE_{\sigma}$  is the standard deviation of the absolute errors;  $AE_{IQR}$  is the inter-quartile range of the absolute errors; MAPE is the mean absolute percentage error, reported in fractional form; and  $R^2$  is the coefficient of determination. Arrows in column headers indicate whether higher or lower is better.

| Scattering Model             | Parameter           | MAE ↓    | $AE_{\sigma}$ | $AE_{IQR}$ | MAPE ↓  | $R^2$ ↑ |
|------------------------------|---------------------|----------|---------------|------------|---------|---------|
| Adsorbed layer               | Adsorbed amount     | 0.862    | 0.554         | 0.822      | 2.808   | 0.255   |
|                              | Density shell       | 0.251    | 0.148         | 0.249      | 0.290   | 0.044   |
|                              | Radius              | 169.103  | 205.555       | 165.773    | 1.632   | -0.037  |
|                              | Second moment       | 0.986    | 1.026         | 0.976      | 0.035   | 0.997   |
| Binary hard sphere           | Volfraction         | 0.062    | 0.036         | 0.058      | 14.358  | 0.067   |
|                              | Radius lg           | 0.638    | 0.815         | 0.605      | 0.176   | 0.846   |
|                              | Radius sm           | 26.520   | 58.706        | 22.264     | 0.116   | 0.940   |
|                              | Volfraction lg      | 0.147    | 0.156         | 0.152      | 1.840   | 0.869   |
| Broad peak                   | Volfraction sm      | 0.032    | 0.030         | 0.034      | 0.899   | 0.644   |
|                              | Lorentz exp         | 0.052    | 0.046         | 0.051      | 0.028   | 0.986   |
|                              | Lorentz length      | 4.011    | 4.360         | 3.970      | 0.071   | 0.938   |
|                              | Lorentz scale       | 12.433   | 10.842        | 13.880     | 0.342   | 0.652   |
| Core multi shell             | Peak pos            | 0.016    | 0.026         | 0.016      | 0.082   | 0.986   |
|                              | Porod exp           | 0.032    | 0.026         | 0.033      | 0.011   | 0.995   |
|                              | Porod scale         | 0.000    | 0.000         | 0.000      | 0.374   | 0.703   |
|                              | N                   | 1.310    | 1.052         | 1.412      | 0.308   | 0.593   |
|                              | Radius              | 145.896  | 190.091       | 162.747    | 1.450   | 0.114   |
|                              | Thickness1          | 177.719  | 206.226       | 198.250    | 2.148   | -0.157  |
|                              | Thickness2          | 186.422  | 214.861       | 214.198    | 2.354   | -0.214  |
|                              | Thickness3          | 187.377  | 211.698       | 209.021    | 2.438   | -0.259  |
|                              | Thickness4          | 190.852  | 223.132       | 216.725    | 2.229   | -0.277  |
|                              | Thickness5          | 195.579  | 217.730       | 222.531    | 2.506   | -0.261  |
| Core shell bicelle           | Thickness6          | 190.307  | 217.657       | 213.596    | 2.339   | -0.300  |
|                              | Thickness7          | 197.992  | 210.381       | 214.292    | 2.761   | -0.239  |
|                              | Thickness8          | 191.228  | 208.704       | 210.022    | 2.450   | -0.255  |
|                              | Thickness9          | 195.301  | 220.654       | 223.486    | 2.243   | -0.317  |
|                              | Thickness10         | 200.640  | 221.206       | 221.734    | 2.390   | -0.291  |
|                              | Length              | 69.649   | 100.546       | 76.930     | 0.568   | 0.766   |
|                              | Radius              | 38.753   | 59.264        | 42.805     | 0.257   | 0.921   |
|                              | Thick face          | 16.333   | 16.300        | 19.172     | 0.506   | 0.168   |
|                              | Thick rim           | 11.695   | 13.348        | 13.586     | 0.361   | 0.516   |
|                              | Core shell cylinder | Length   | 413.824       | 898.812    | 354.404 | 0.448   |
| Radius                       |                     | 307.195  | 679.054       | 253.536    | 0.277   | 0.906   |
| Thickness                    |                     | 13.004   | 13.956        | 13.174     | 0.204   | 0.886   |
| Core shell ellipsoid         | Radius equat core   | 31.362   | 54.297        | 30.452     | 0.172   | 0.947   |
|                              | Thick shell         | 4.690    | 8.358         | 4.320      | 0.312   | 0.860   |
|                              | X core              | 0.716    | 0.784         | 0.703      | 0.396   | 0.869   |
| Core shell sphere            | X polar shell       | 1.525    | 1.331         | 1.693      | 0.902   | 0.517   |
|                              | Radius              | 27.392   | 47.397        | 27.654     | 0.150   | 0.956   |
|                              | Thickness           | 4.274    | 7.868         | 3.910      | 0.256   | 0.883   |
| Correlation length           | Cor length          | 1.207    | 1.051         | 1.243      | 0.024   | 0.995   |
|                              | Lorentz exp         | 0.015    | 0.012         | 0.016      | 0.006   | 0.997   |
|                              | Lorentz scale       | 4.452    | 5.067         | 4.326      | 0.087   | 0.936   |
|                              | Porod exp           | 0.019    | 0.016         | 0.019      | 0.008   | 0.993   |
| Cylinder                     | Porod scale         | 0.000    | 0.000         | 0.000      | 0.123   | 0.851   |
|                              | Length              | 1698.570 | 4163.153      | 1084.535   | 0.191   | 0.960   |
|                              | Radius              | 21.786   | 37.560        | 22.131     | 0.097   | 0.972   |
| Dab                          | Cor length          | 8.309    | 15.362        | 7.192      | 0.027   | 0.996   |
|                              | Radius equatorial   | 20.264   | 33.426        | 21.469     | 0.092   | 0.979   |
| Ellipsoid                    | Radius polar        | 27.992   | 49.168        | 28.525     | 0.127   | 0.952   |
|                              | Axis ratio          | 52.091   | 110.994       | 41.087     | 0.349   | 0.748   |
| Elliptical cylinder          | Length              | 2302.328 | 6575.117      | 1393.437   | 0.404   | 0.894   |
|                              | Radius minor        | 35.539   | 67.944        | 33.574     | 0.183   | 0.911   |
|                              | Kuhn length         | 38.042   | 66.663        | 38.915     | 0.187   | 0.909   |
| Flexible cylinder            | Length              | 2511.259 | 6269.678      | 1521.593   | 0.263   | 0.906   |
|                              | Radius              | 20.779   | 37.871        | 20.353     | 0.085   | 0.972   |
| Flexible cylinder elliptical | Axis ratio          | 0.214    | 0.226         | 0.216      | 0.052   | 0.986   |
|                              | Kuhn length         | 24.236   | 38.025        | 25.938     | 0.136   | 0.969   |
|                              | Length              | 1581.836 | 4314.192      | 830.649    | 0.157   | 0.952   |

Table 6 Scattering-model parameter regression results part 2 of 4. MAE is the mean absolute error;  $AE_{\sigma}$  is the standard deviation of the absolute errors;  $AE_{IQR}$  is the inter-quartile range of the absolute errors; MAPE is the mean absolute percentage error, reported in fractional form; and  $R^2$  is the coefficient of determination. Arrows in column headers indicate whether higher or lower is better.

| Scattering Model              | Parameter          | MAE ↓   | $AE_{\sigma}$ | $AE_{IQR}$ | MAPE ↓ | $R^2$ ↑ |
|-------------------------------|--------------------|---------|---------------|------------|--------|---------|
| Fractal core shell            | Cor length         | 2.280   | 1.485         | 2.323      | 0.688  | -0.070  |
|                               | Fractal dim        | 0.399   | 0.243         | 0.388      | 0.186  | -0.094  |
|                               | Radius             | 3.500   | 3.658         | 3.454      | 0.188  | 0.859   |
|                               | Thickness          | 2.973   | 3.196         | 2.939      | 0.151  | 0.892   |
|                               | Volfraction        | 0.021   | 0.014         | 0.020      | 0.582  | 0.145   |
| Fractal                       | Cor length         | 1.253   | 1.110         | 1.337      | 0.381  | 0.605   |
|                               | Fractal dim        | 0.341   | 0.227         | 0.364      | 0.158  | 0.143   |
|                               | Radius             | 0.935   | 0.798         | 0.959      | 0.048  | 0.992   |
|                               | Volfraction        | 0.022   | 0.013         | 0.021      | 0.677  | 0.073   |
| Fuzzy sphere                  | Fuzziness          | 0.058   | 0.066         | 0.057      | 0.079  | 0.971   |
|                               | Radius             | 13.248  | 23.446        | 13.381     | 0.060  | 0.989   |
| Gauss Lorentz gel             | Cor length dynamic | 21.497  | 40.551        | 20.276     | 0.080  | 0.969   |
|                               | Cor length static  | 27.348  | 55.642        | 26.081     | 0.119  | 0.941   |
|                               | Gauss scale        | 462.762 | 894.316       | 467.135    | 0.425  | 0.821   |
|                               | Lorentz scale      | 528.680 | 1080.449      | 454.921    | 0.358  | 0.736   |
| Gaussian peak                 | Peak pos           | 0.011   | 0.013         | 0.011      | 0.178  | 0.997   |
|                               | Sigma              | 0.002   | 0.001         | 0.002      | 0.184  | 0.995   |
| Gel fit                       | Cor length         | 25.259  | 45.994        | 22.563     | 0.097  | 0.960   |
|                               | Fractal dim        | 0.070   | 0.064         | 0.071      | 0.031  | 0.989   |
|                               | Guinier scale      | 7.748   | 8.943         | 8.489      | 0.213  | 0.787   |
|                               | Lorentz scale      | 8.106   | 9.770         | 8.737      | 0.208  | 0.756   |
|                               | Rg                 | 22.843  | 44.256        | 21.524     | 0.089  | 0.964   |
| Guinier                       | Rg                 | 11.136  | 18.799        | 11.377     | 0.035  | 0.994   |
|                               | Length             | 272.465 | 616.818       | 211.554    | 0.196  | 0.922   |
| Hollow cylinder               | Radius             | 450.768 | 942.475       | 302.335    | 0.230  | 0.817   |
|                               | Thickness          | 9.548   | 10.913        | 9.419      | 0.163  | 0.933   |
|                               | B2a ratio          | 0.183   | 0.138         | 0.190      | 1.169  | 0.382   |
| Hollow rect. prism thin walls | C2a ratio          | 0.184   | 0.139         | 0.179      | 1.091  | 0.363   |
|                               | Length a           | 23.331  | 38.720        | 24.063     | 0.111  | 0.969   |
|                               | Thickness          | 1.216   | 1.462         | 1.258      | 0.030  | 0.995   |
| Lamellar                      | Length head        | 4.644   | 5.356         | 4.481      | 0.141  | 0.937   |
|                               | Length tail        | 5.849   | 6.059         | 5.863      | 0.179  | 0.909   |
| Lamellar hg stack caille      | Caille parameter   | 0.048   | 0.044         | 0.050      | 0.557  | 0.806   |
|                               | D spacing          | 0.309   | 0.326         | 0.296      | 0.043  | 0.903   |
|                               | Length head        | 10.278  | 10.871        | 10.150     | 0.350  | 0.714   |
|                               | Length tail        | 10.139  | 10.143        | 10.041     | 0.356  | 0.737   |
| Lamellar stack caille         | Nlayers            | 39.664  | 37.169        | 40.098     | 0.154  | 0.965   |
|                               | Caille parameter   | 0.059   | 0.057         | 0.064      | 0.987  | 0.682   |
|                               | D spacing          | 0.460   | 0.518         | 0.443      | 0.122  | 0.930   |
|                               | Nlayers            | 59.351  | 64.066        | 59.459     | 0.204  | 0.909   |
|                               | Thickness          | 3.345   | 3.648         | 3.240      | 0.105  | 0.969   |
| Lamellar stack paracryst.     | D spacing          | 0.598   | 0.577         | 0.640      | 0.148  | 0.901   |
|                               | Nlayers            | 68.483  | 72.548        | 70.012     | 0.239  | 0.884   |
|                               | Sigma d            | 0.048   | 0.049         | 0.049      | 0.707  | 0.947   |
| Linear pearls                 | Thickness          | 2.972   | 3.546         | 2.921      | 0.091  | 0.973   |
|                               | Edge sep           | 1.441   | 1.524         | 1.472      | 0.499  | 0.917   |
|                               | Num pearls         | 0.307   | 0.235         | 0.313      | 0.051  | 0.966   |
| Lorentz                       | Radius             | 11.784  | 20.275        | 11.836     | 0.051  | 0.992   |
|                               | Cor length         | 11.196  | 20.121        | 10.597     | 0.034  | 0.993   |
| Mass fractal                  | Cutoff length      | 0.331   | 0.310         | 0.341      | 0.064  | 0.964   |
|                               | Fractal dim mass   | 0.080   | 0.071         | 0.079      | 0.036  | 0.923   |
|                               | Radius             | 1.009   | 1.190         | 1.073      | 0.024  | 0.996   |
| Mass surface fractal          | Fractal dim mass   | 0.048   | 0.046         | 0.047      | 0.022  | 0.970   |
|                               | Fractal dim surf   | 0.038   | 0.033         | 0.039      | 0.015  | 0.972   |
|                               | Rg cluster         | 1.811   | 2.244         | 1.815      | 0.045  | 0.988   |
|                               | Rg primary         | 203.827 | 434.901       | 191.485    | 0.078  | 0.966   |
| Mono Gauss coil               | I zero             | 373.734 | 1003.459      | 120.201    | 0.279  | 0.758   |
|                               | Rg                 | 8.919   | 15.069        | 8.770      | 0.039  | 0.996   |
| Multilayer vesicle            | N shells           | 0.814   | 0.763         | 0.819      | 0.111  | 0.976   |
|                               | Radius             | 48.477  | 68.633        | 49.300     | 0.451  | 0.894   |
|                               | Thick shell        | 3.308   | 4.083         | 3.401      | 0.088  | 0.956   |
|                               | Thick solvent      | 3.363   | 4.651         | 3.358      | 0.094  | 0.948   |

Table 7 Scattering-model parameter regression results part 3 of 4. MAE is the mean absolute error;  $AE_{\sigma}$  is the standard deviation of the absolute errors;  $AE_{IQR}$  is the inter-quartile range of the absolute errors; MAPE is the mean absolute percentage error, reported in fractional form; and  $R^2$  is the coefficient of determination. Arrows in column headers indicate whether higher or lower is better.

| Scattering Model    | Parameter        | MAE ↓    | $AE_{\sigma}$ | $AE_{IQR}$ | MAPE ↓ | $R^2$ ↑ |
|---------------------|------------------|----------|---------------|------------|--------|---------|
| Onion               | A1               | 2.397    | 1.782         | 2.541      | 2.714  | -0.055  |
|                     | A2               | 2.751    | 1.826         | 2.709      | 2.378  | -0.299  |
|                     | A3               | 2.764    | 1.777         | 2.775      | 2.235  | -0.271  |
|                     | A4               | 2.734    | 1.785         | 2.755      | 6.144  | -0.250  |
|                     | A5               | 2.689    | 1.760         | 2.679      | 2.844  | -0.248  |
|                     | A6               | 2.686    | 1.717         | 2.631      | 3.223  | -0.211  |
|                     | A7               | 2.728    | 1.730         | 2.680      | 4.075  | -0.229  |
|                     | A8               | 2.733    | 1.763         | 2.714      | 2.757  | -0.241  |
|                     | A9               | 2.730    | 1.747         | 2.704      | 3.473  | -0.243  |
|                     | A10              | 2.738    | 1.762         | 2.735      | 6.417  | -0.226  |
| Parallelepiped      | Radius core      | 42.121   | 68.370        | 44.345     | 0.205  | 0.904   |
|                     | Thickness1       | 5.121    | 4.683         | 5.194      | 0.157  | 0.939   |
|                     | Thickness2       | 26.134   | 16.770        | 25.898     | 1.027  | -0.236  |
|                     | Thickness3       | 26.088   | 16.983        | 25.996     | 1.025  | -0.252  |
|                     | Thickness4       | 26.218   | 17.096        | 26.058     | 0.984  | -0.280  |
|                     | Thickness5       | 26.216   | 16.845        | 25.815     | 1.038  | -0.251  |
|                     | Thickness6       | 25.774   | 16.787        | 25.698     | 1.000  | -0.241  |
|                     | Thickness7       | 26.246   | 16.998        | 26.143     | 0.978  | -0.246  |
|                     | Thickness8       | 26.638   | 17.695        | 27.026     | 1.106  | -0.314  |
|                     | Thickness9       | 26.455   | 16.989        | 26.541     | 0.989  | -0.267  |
| Parallelepiped      | Thickness10      | 26.450   | 17.005        | 26.235     | 1.003  | -0.278  |
|                     | Length a         | 137.189  | 170.439       | 158.590    | 1.467  | 0.280   |
|                     | Length b         | 146.516  | 182.981       | 161.079    | 1.136  | 0.263   |
| Peak Lorentz        | Length c         | 58.388   | 112.911       | 51.739     | 0.362  | 0.770   |
|                     | Peak hwhm        | 0.165    | 0.453         | 0.089      | 0.109  | 0.957   |
|                     | Peak pos         | 0.013    | 0.026         | 0.011      | 0.094  | 0.985   |
| Pearl necklace      | Edge sep         | 1.146    | 1.393         | 1.062      | 0.938  | 0.941   |
|                     | Num pearls       | 0.332    | 0.261         | 0.345      | 0.055  | 0.958   |
|                     | Radius           | 15.205   | 29.026        | 14.651     | 0.059  | 0.984   |
| Poly Gauss coil     | Thick string     | 0.258    | 0.146         | 0.250      | 1.904  | -0.026  |
|                     | I zero           | 686.649  | 1380.500      | 608.009    | 0.606  | 0.619   |
|                     | Rg               | 5.217    | 8.087         | 5.741      | 0.036  | 0.997   |
| Polymer excl volume | Porod exp        | 0.029    | 0.023         | 0.029      | 0.014  | 0.998   |
|                     | Rg               | 12.619   | 23.078        | 11.683     | 0.048  | 0.990   |
| Power law           | Power            | 0.030    | 0.024         | 0.032      | 0.013  | 0.999   |
| Raspberry           | Penetration      | 0.250    | 0.159         | 0.259      | 3.335  | -0.001  |
|                     | Radius lg        | 8292.868 | 13153.885     | 10607.428  | 0.305  | 0.643   |
|                     | Radius sm        | 9.858    | 18.550        | 8.633      | 0.117  | 0.938   |
|                     | Surface fraction | 0.137    | 0.105         | 0.143      | 1.103  | 0.445   |
|                     | Volfraction lg   | 0.053    | 0.037         | 0.054      | 2.491  | 0.235   |
|                     | Volfraction sm   | 0.022    | 0.015         | 0.021      | 2.495  | 0.205   |
| Rectangular prism   | B2a ratio        | 0.178    | 0.132         | 0.186      | 1.214  | 0.435   |
|                     | C2a ratio        | 0.176    | 0.131         | 0.186      | 0.986  | 0.426   |
|                     | Length a         | 27.168   | 47.821        | 26.042     | 0.121  | 0.954   |
| Sphere              | Radius           | 50.658   | 112.679       | 35.561     | 0.073  | 0.977   |
|                     | N stacking       | 6.853    | 6.508         | 7.067      | 0.221  | 0.892   |
| Stacked disks       | Radius           | 1.761    | 1.570         | 1.832      | 0.076  | 0.968   |
|                     | Sigma d          | 0.032    | 0.027         | 0.033      | 3.802  | 0.676   |
|                     | Thick core       | 7.524    | 6.438         | 7.941      | 0.388  | 0.443   |
|                     | Thick layer      | 6.000    | 5.547         | 6.358      | 0.321  | 0.615   |

Table 8 Scattering-model parameter regression results part 4 of 4. MAE is the mean absolute error;  $AE_{\sigma}$  is the standard deviation of the absolute errors;  $AE_{IQR}$  is the inter-quartile range of the absolute errors; MAPE is the mean absolute percentage error, reported in fractional form; and  $R^2$  is the coefficient of determination. Arrows in column headers indicate whether higher or lower is better.

| Scattering Model   | Parameter          | MAE ↓    | $AE_{\sigma}$ | $AE_{IQR}$ | MAPE ↓ | $R^2$ ↑ |
|--------------------|--------------------|----------|---------------|------------|--------|---------|
| Star polymer       | Arms               | 0.145    | 0.131         | 0.152      | 0.047  | 0.995   |
|                    | Rg squared         | 11.879   | 21.198        | 11.261     | 0.048  | 0.992   |
| Surface fractal    | Cutoff length      | 3.899    | 6.085         | 3.105      | 0.143  | 0.933   |
|                    | Fractal dim surf   | 0.048    | 0.047         | 0.048      | 0.026  | 0.987   |
| Teubner strey      | Radius             | 1.255    | 2.126         | 0.994      | 0.060  | 0.965   |
|                    | D                  | 5.049    | 11.467        | 4.768      | 0.048  | 0.977   |
| Triaxial ellipsoid | Xi                 | 2.286    | 2.941         | 2.088      | 0.078  | 0.983   |
|                    | Radius equat major | 855.134  | 1705.382      | 780.210    | 2.302  | 0.332   |
| Two Lorentzian     | Radius equat minor | 425.736  | 885.682       | 358.434    | 0.522  | 0.811   |
|                    | Radius polar       | 801.364  | 1462.445      | 883.625    | 1.080  | 0.493   |
| Two power law      | Lorentz exp 1      | 0.035    | 0.027         | 0.036      | 0.018  | 0.994   |
|                    | Lorentz exp 2      | 0.330    | 0.286         | 0.418      | 0.183  | 0.434   |
| Unified power rg   | Lorentz length 1   | 18.639   | 22.285        | 18.624     | 0.046  | 0.988   |
|                    | Lorentz length 2   | 11.854   | 15.996        | 15.152     | 1.004  | 0.366   |
| Two power law      | Lorentz scale 1    | 970.034  | 1514.220      | 1076.143   | 0.691  | 0.511   |
|                    | Lorentz scale 2    | 0.022    | 0.014         | 0.022      | 0.658  | 0.074   |
| Unified power rg   | Coefficient 1      | 1454.772 | 2246.504      | 1199.095   | 5.652  | -0.238  |
|                    | Crossover          | 0.020    | 0.027         | 0.018      | 0.183  | 0.947   |
| Unified power rg   | Power 1            | 0.044    | 0.037         | 0.045      | 0.021  | 0.996   |
|                    | Power 2            | 0.065    | 0.053         | 0.068      | 0.031  | 0.991   |
| Unified power rg   | B1                 | 0.000    | 0.000         | 0.000      | 1.245  | 0.412   |
|                    | B2                 | 0.000    | 0.000         | 0.000      | 5.019  | -0.241  |
| Unified power rg   | B3                 | 0.000    | 0.000         | 0.000      | 5.839  | -0.208  |
|                    | B4                 | 0.000    | 0.000         | 0.000      | 5.152  | -0.239  |
| Unified power rg   | B5                 | 0.000    | 0.000         | 0.000      | 5.105  | -0.248  |
|                    | B6                 | 0.000    | 0.000         | 0.000      | 4.961  | -0.245  |
| Unified power rg   | G1                 | 9034.578 | 15833.418     | 8468.681   | 2.547  | 0.301   |
|                    | G2                 | 0.248    | 0.156         | 0.252      | 1.694  | -0.067  |
| Unified power rg   | G3                 | 0.252    | 0.156         | 0.248      | 1.888  | -0.090  |
|                    | G4                 | 0.254    | 0.154         | 0.249      | 1.871  | -0.075  |
| Unified power rg   | G5                 | 0.254    | 0.154         | 0.245      | 1.888  | -0.110  |
|                    | G6                 | 0.255    | 0.157         | 0.256      | 1.690  | -0.100  |
| Unified power rg   | Level              | 0.897    | 0.667         | 1.008      | 0.297  | 0.426   |
|                    | Power1             | 0.191    | 0.197         | 0.186      | 0.094  | 0.903   |
| Unified power rg   | Power2             | 0.772    | 0.471         | 0.777      | 0.383  | -0.085  |
|                    | Power3             | 0.799    | 0.479         | 0.763      | 0.396  | -0.099  |
| Unified power rg   | Power4             | 0.786    | 0.477         | 0.769      | 0.390  | -0.098  |
|                    | Power5             | 0.780    | 0.482         | 0.799      | 0.394  | -0.098  |
| Unified power rg   | Power6             | 0.791    | 0.488         | 0.791      | 0.399  | -0.101  |
|                    | Rg1                | 5237.482 | 10346.564     | 4683.649   | 0.312  | 0.743   |
| Unified power rg   | Rg2                | 0.182    | 0.152         | 0.217      | 1.246  | 0.313   |
|                    | Rg3                | 0.229    | 0.153         | 0.230      | 1.486  | 0.072   |
| Unified power rg   | Rg4                | 0.249    | 0.155         | 0.239      | 1.531  | -0.050  |
|                    | Rg5                | 0.256    | 0.156         | 0.254      | 1.843  | -0.081  |
| Unified power rg   | Rg6                | 0.258    | 0.153         | 0.247      | 1.759  | -0.070  |
|                    | Radius             | 6381.184 | 10996.375     | 7044.523   | 0.236  | 0.767   |
| Vesicle            | Thickness          | 1.882    | 2.301         | 1.943      | 0.048  | 0.987   |
|                    | Volfraction        | 0.229    | 0.144         | 0.224      | 16.524 | 0.163   |

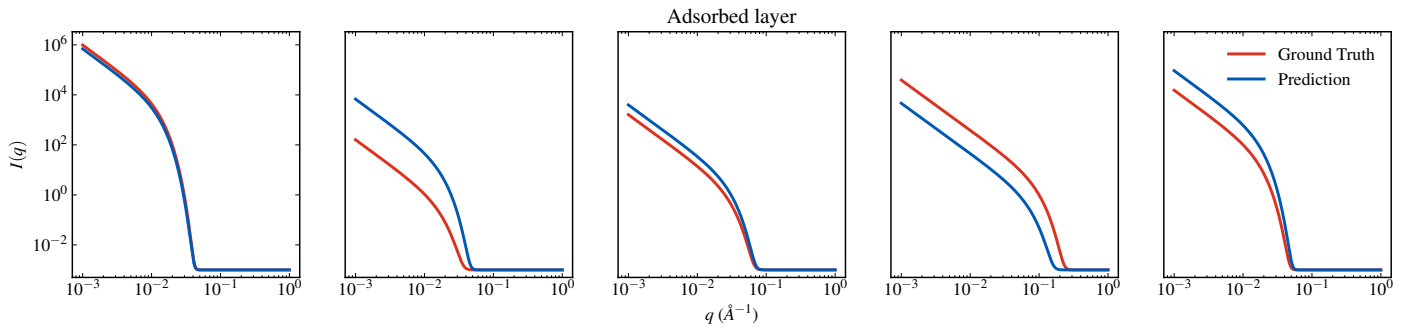

Fig. 1 Comparing predicted and ground-truth adsorbed layer models. Predicted intensities are constructed from SASformer’s predicted scattering-model parameters using the sasmodels Python package.

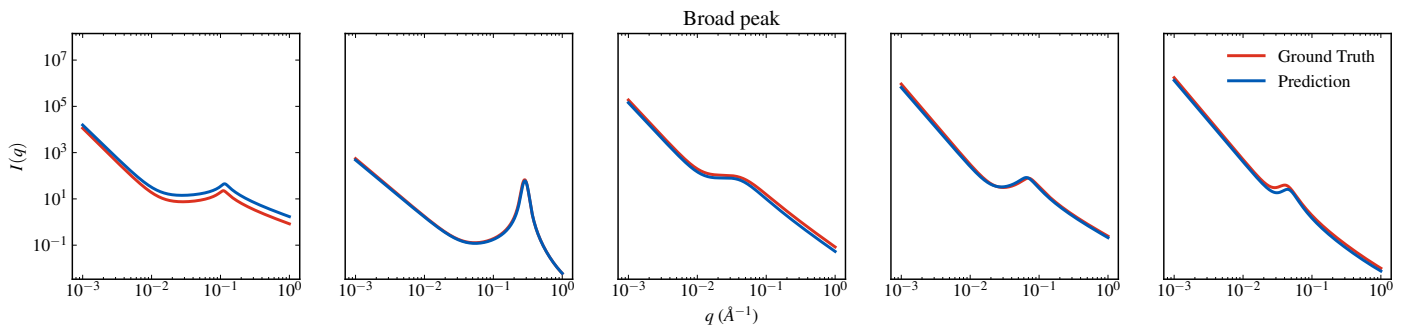

Fig. 2 Comparing predicted and ground-truth broad peak models. Predicted intensities are constructed from SASformer’s predicted scattering-model parameters using the sasmodels Python package.

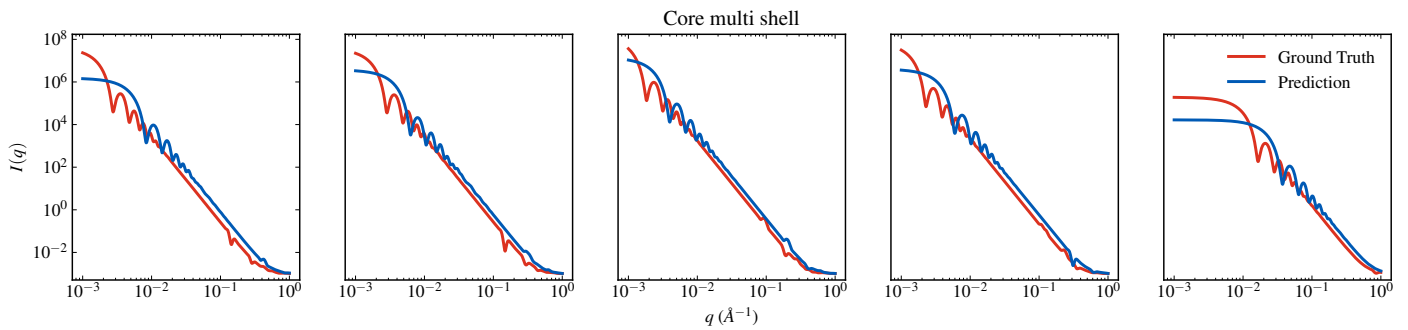

Fig. 3 Comparing predicted and ground-truth core multi shell models. Predicted intensities are constructed from SASformer’s predicted scattering-model parameters using the sasmodels Python package.

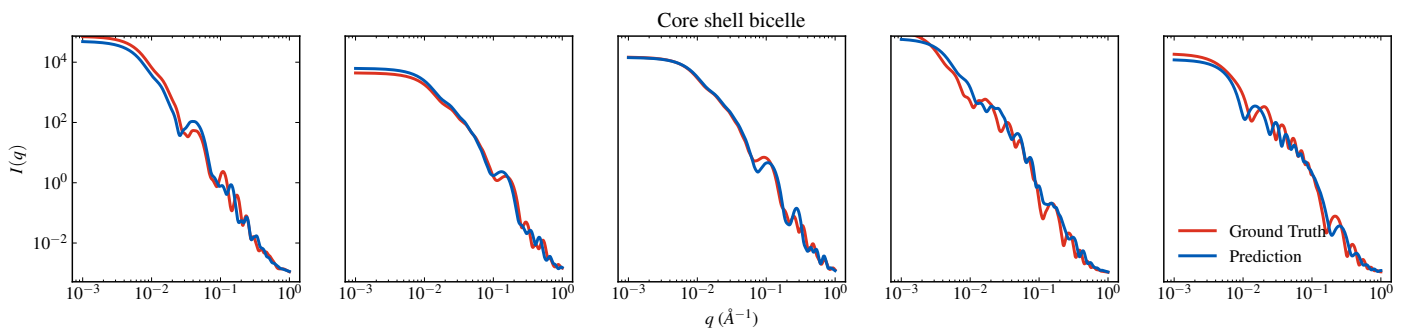

Fig. 4 Comparing predicted and ground-truth core shell bicelle models. Predicted intensities are constructed from SASformer’s predicted scattering-model parameters using the sasmodels Python package.



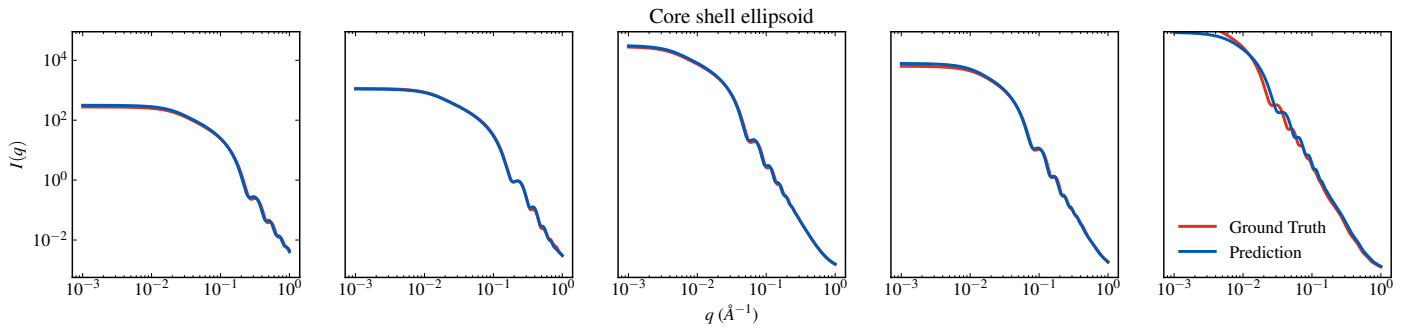

Fig. 5 Comparing predicted and ground-truth core shell ellipsoid models. Predicted intensities are constructed from SASformer's predicted scattering-model parameters using the sasmodels Python package.

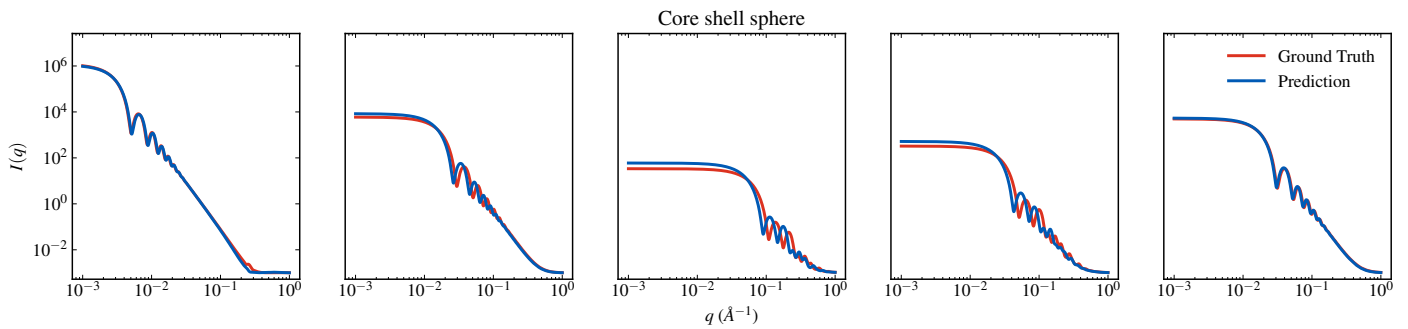

Fig. 6 Comparing predicted and ground-truth core shell sphere models. Predicted intensities are constructed from SASformer's predicted scattering-model parameters using the sasmodels Python package.

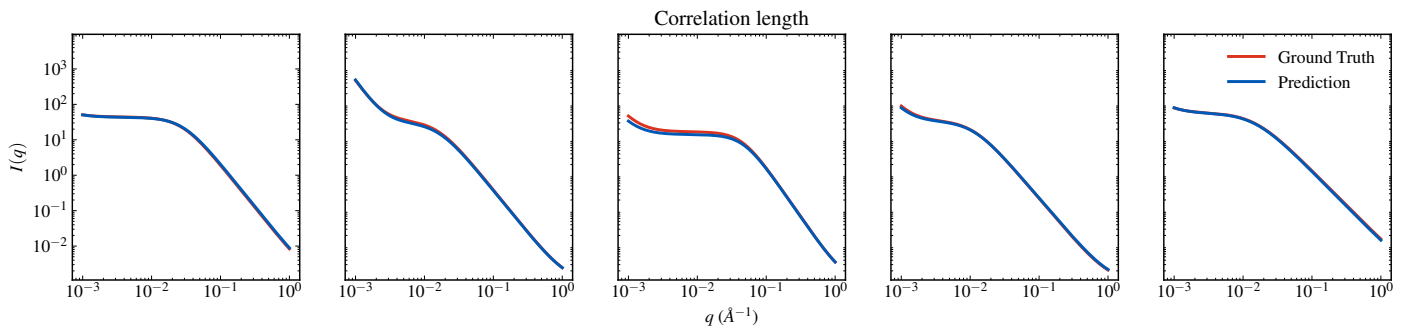

Fig. 7 Comparing predicted and ground-truth correlation length models. Predicted intensities are constructed from SASformer's predicted scattering-model parameters using the sasmodels Python package.

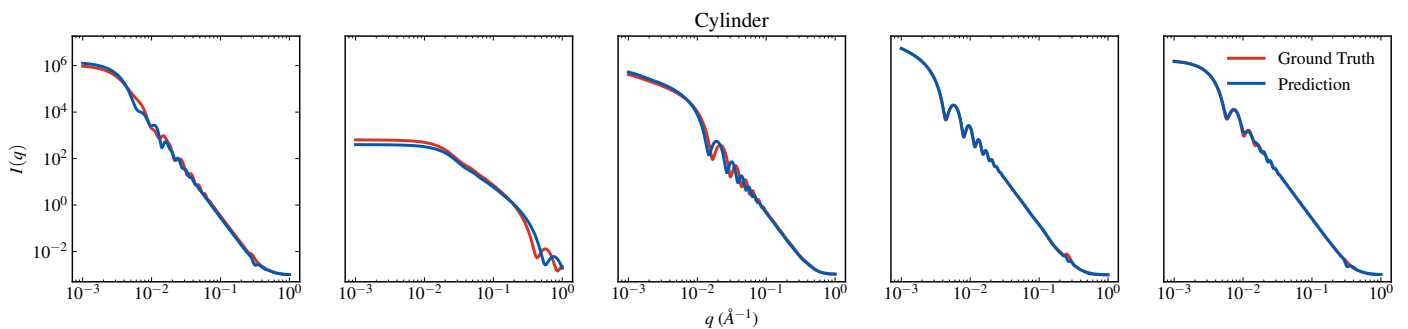

Fig. 8 Comparing predicted and ground-truth cylinder models. Predicted intensities are constructed from SASformer's predicted scattering-model parameters using the sasmodels Python package.

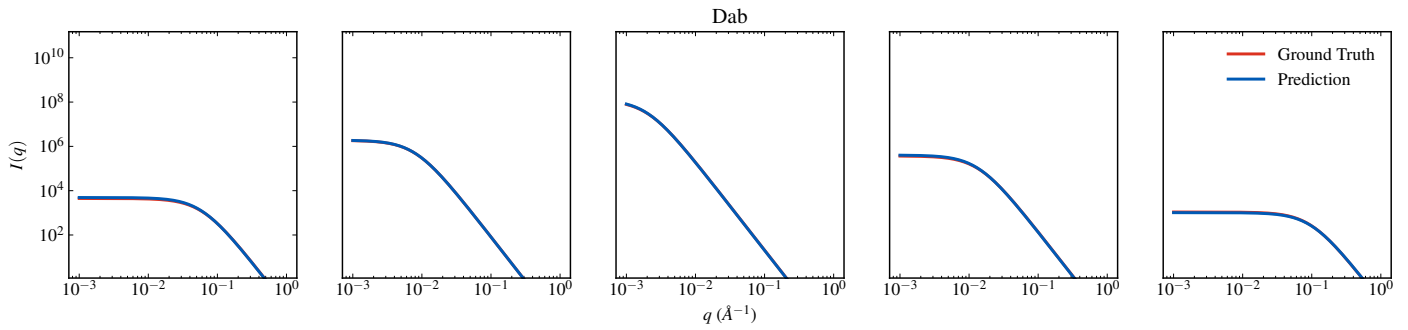

Fig. 9 Comparing predicted and ground-truth dab models. Predicted intensities are constructed from SASformer's predicted scattering-model parameters using the sasmodels Python package.

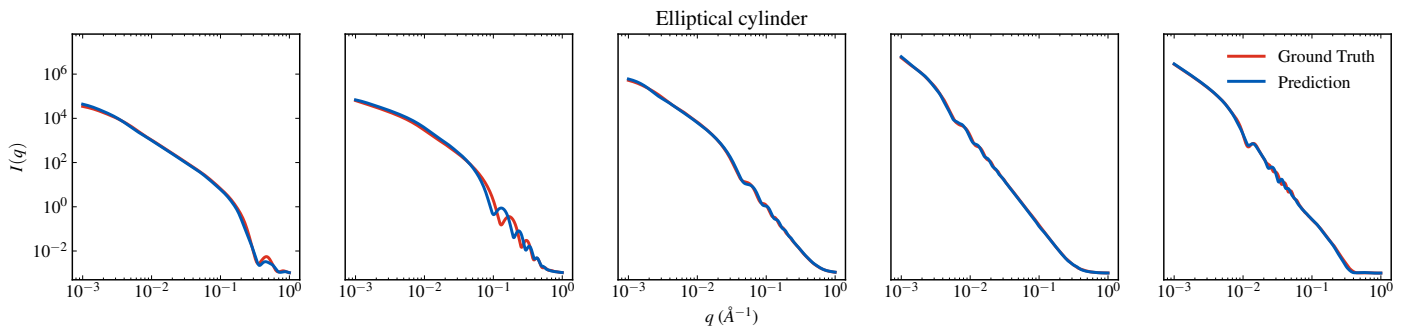

Fig. 10 Comparing predicted and ground-truth elliptical cylinder models. Predicted intensities are constructed from SASformer's predicted scattering-model parameters using the sasmodels Python package.

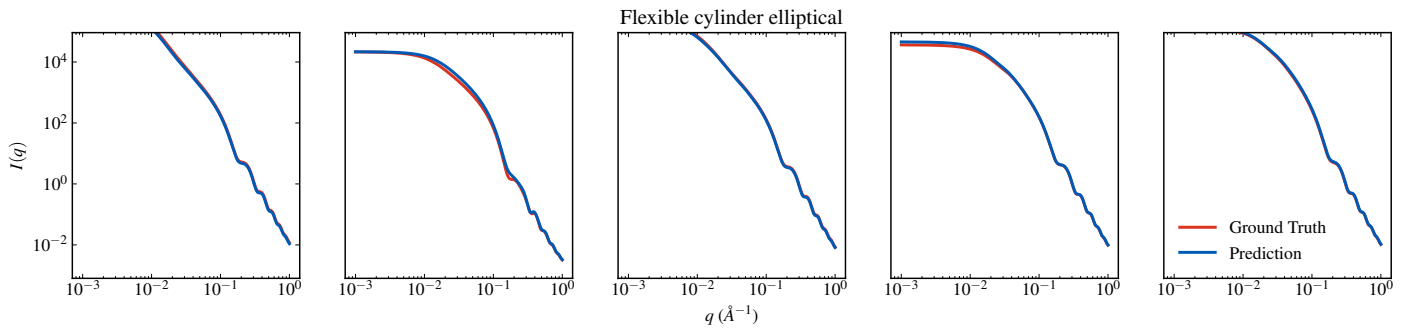

Fig. 11 Comparing predicted and ground-truth flexible cylinder elliptical models. Predicted intensities are constructed from SASformer's predicted scattering-model parameters using the sasmodels Python package.

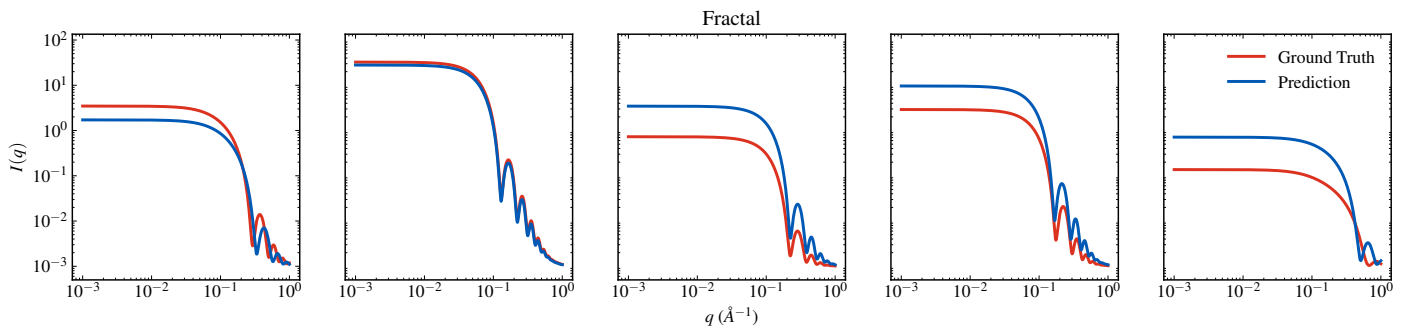

Fig. 12 Comparing predicted and ground-truth fractal models. Predicted intensities are constructed from SASformer's predicted scattering-model parameters using the sasmodels Python package.

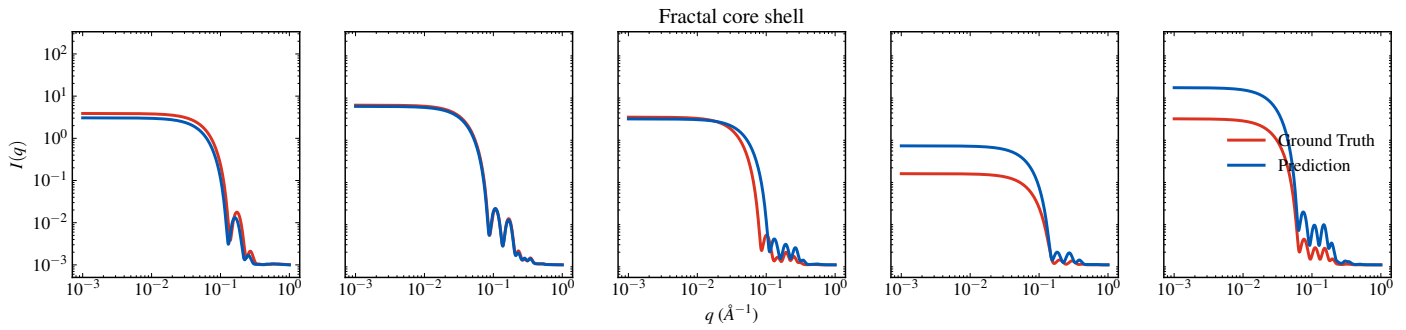

Fig. 13 Comparing predicted and ground-truth fractal core shell models. Predicted intensities are constructed from SASformer's predicted scattering-model parameters using the sasmodels Python package.

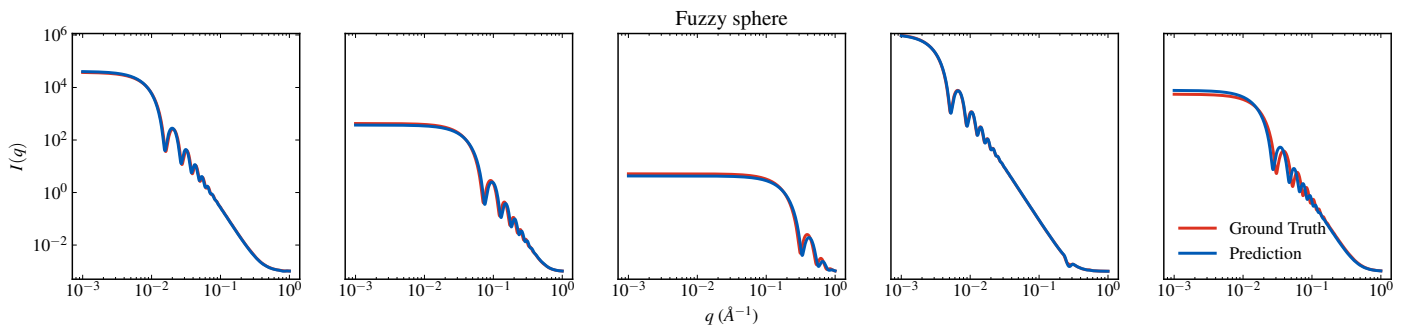

Fig. 14 Comparing predicted and ground-truth fuzzy sphere models. Predicted intensities are constructed from SASformer's predicted scattering-model parameters using the sasmodels Python package.

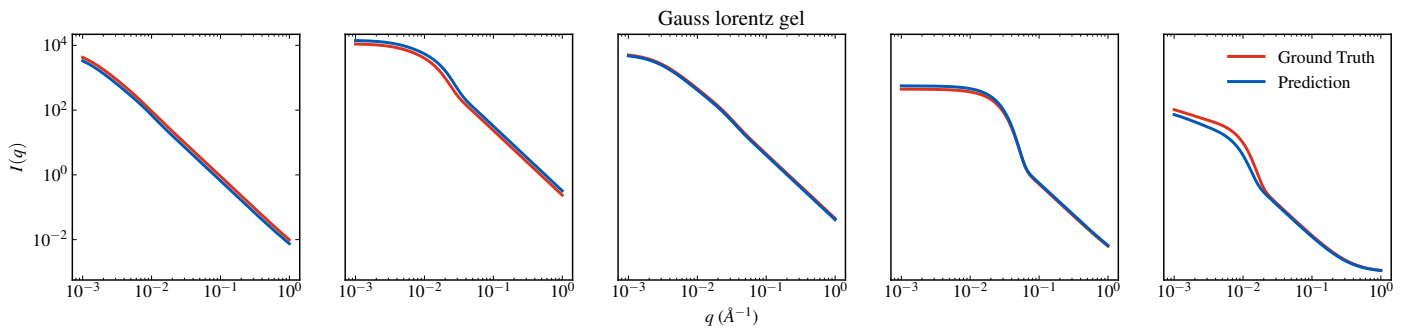

Fig. 15 Comparing predicted and ground-truth gauss lorentz gel models. Predicted intensities are constructed from SASformer's predicted scattering-model parameters using the sasmodels Python package.

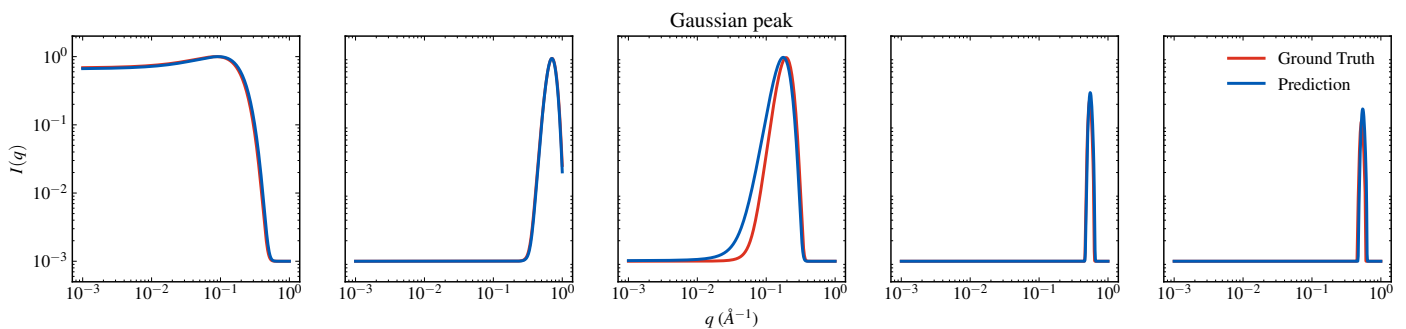

Fig. 16 Comparing predicted and ground-truth gaussian peak models. Predicted intensities are constructed from SASformer's predicted scattering-model parameters using the sasmodels Python package.

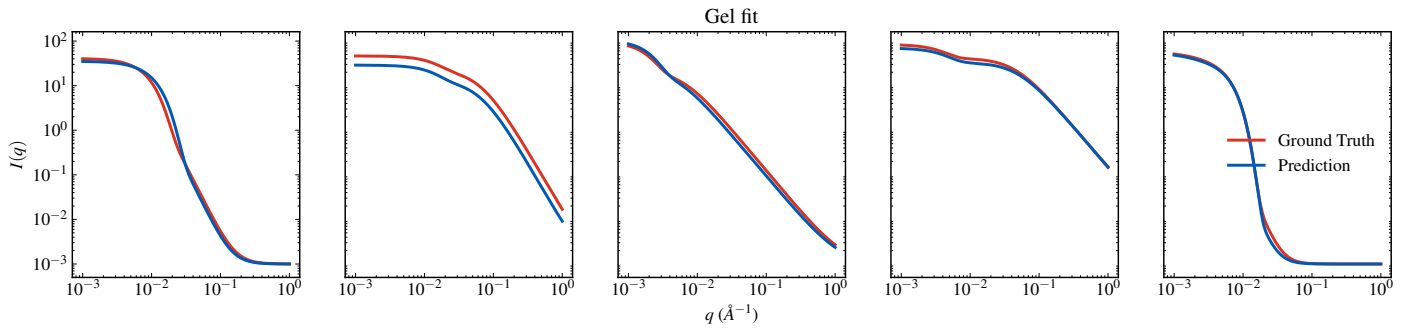

Fig. 17 Comparing predicted and ground-truth gel fit models. Predicted intensities are constructed from SASformer's predicted scattering-model parameters using the sasmodels Python package.

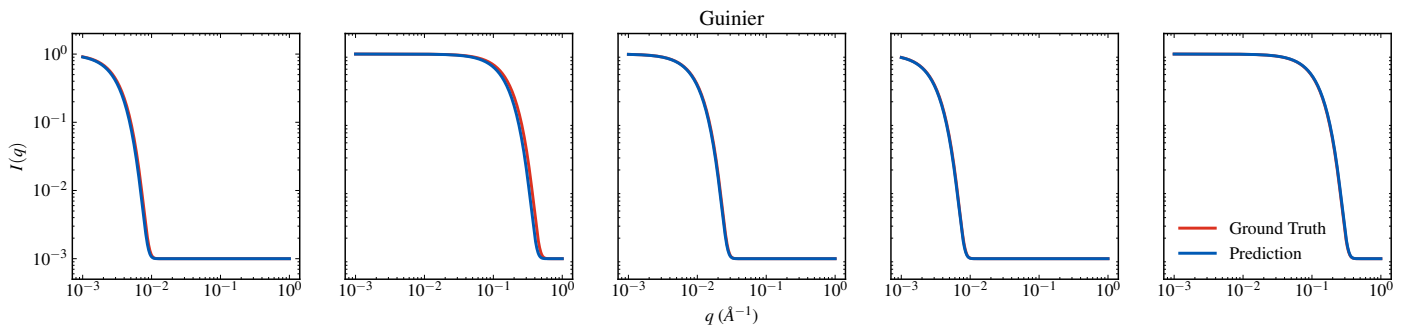

Fig. 18 Comparing predicted and ground-truth guinier models. Predicted intensities are constructed from SASformer's predicted scattering-model parameters using the sasmodels Python package.

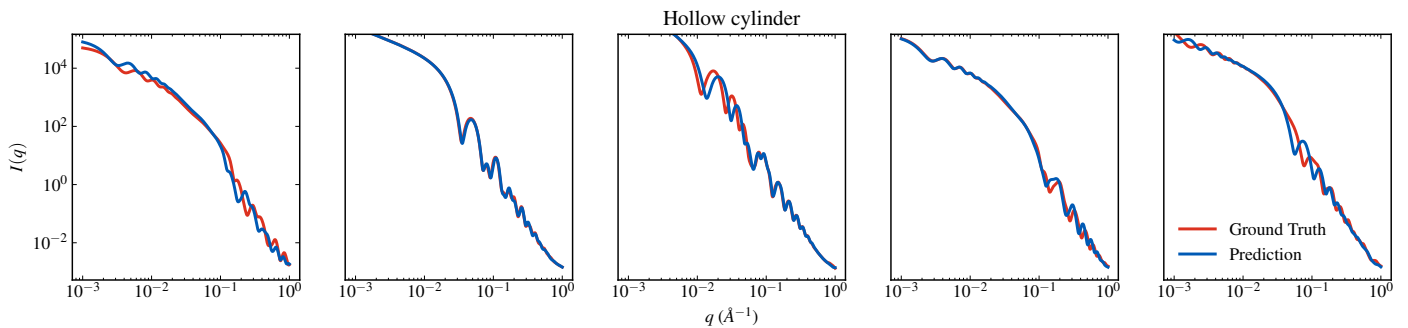

Fig. 19 Comparing predicted and ground-truth hollow cylinder models. Predicted intensities are constructed from SASformer's predicted scattering-model parameters using the sasmodels Python package.

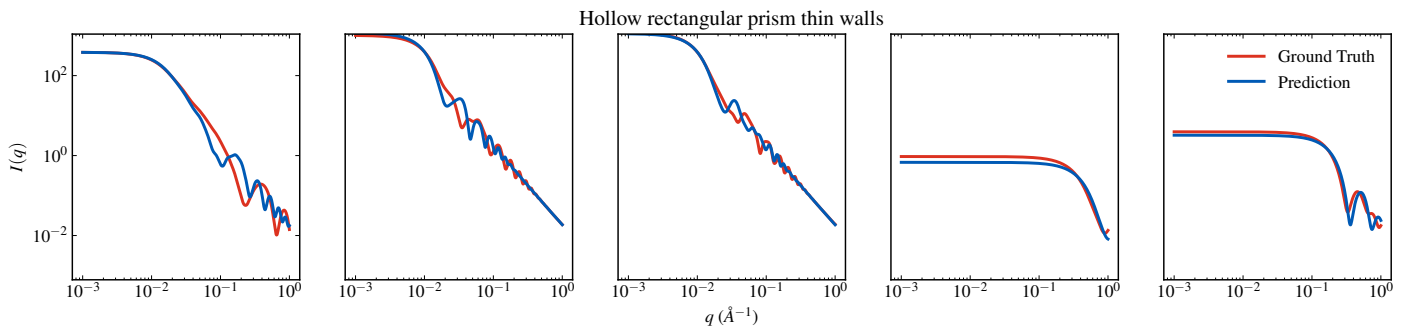

Fig. 20 Comparing predicted and ground-truth hollow rectangular prism thin walls models. Predicted intensities are constructed from SASformer's predicted scattering-model parameters using the sasmodels Python package.

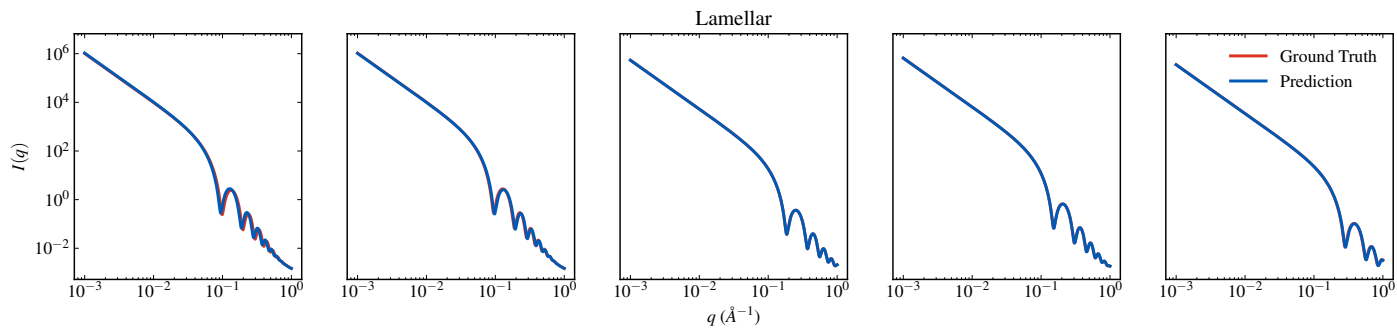

Fig. 21 Comparing predicted and ground-truth lamellar models. Predicted intensities are constructed from SASformer's predicted scattering-model parameters using the sasmodels Python package.

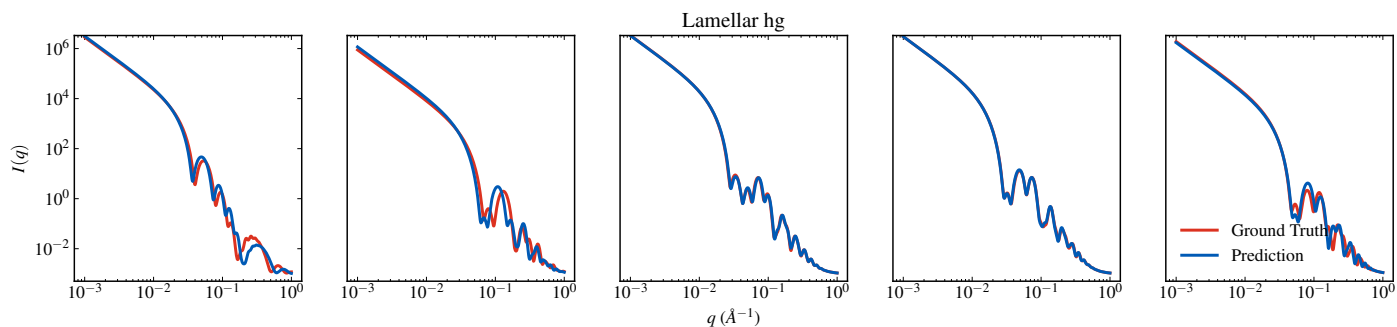

Fig. 22 Comparing predicted and ground-truth lamellar hg models. Predicted intensities are constructed from SASformer's predicted scattering-model parameters using the sasmodels Python package.

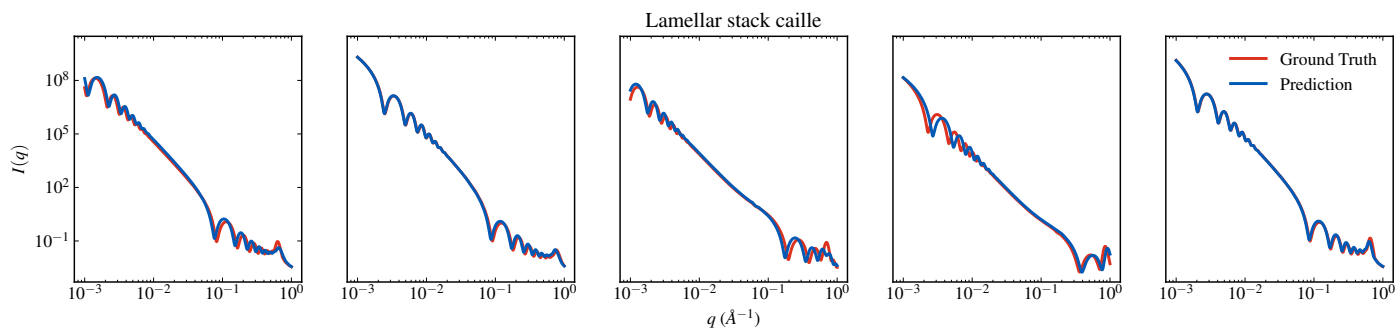

Fig. 23 Comparing predicted and ground-truth lamellar stack caille models. Predicted intensities are constructed from SASformer's predicted scattering-model parameters using the sasmodels Python package.

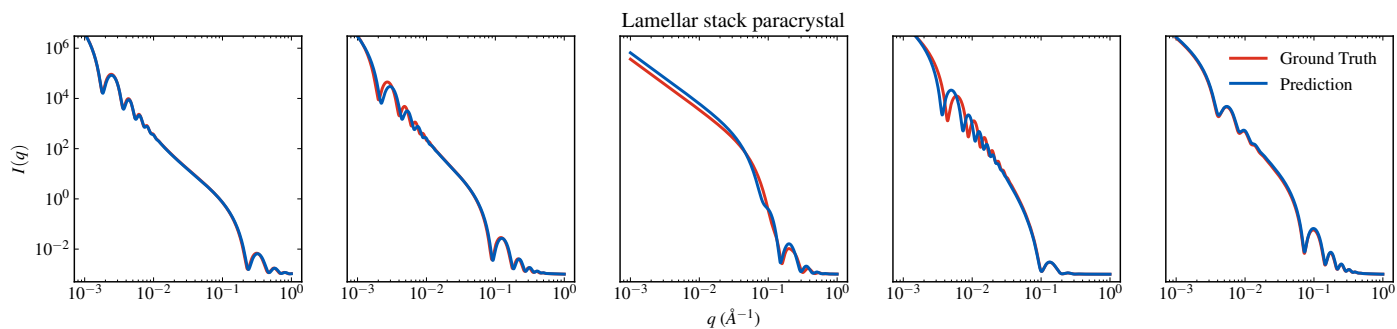

Fig. 24 Comparing predicted and ground-truth lamellar stack paracrystal models. Predicted intensities are constructed from SASformer's predicted scattering-model parameters using the sasmodels Python package.

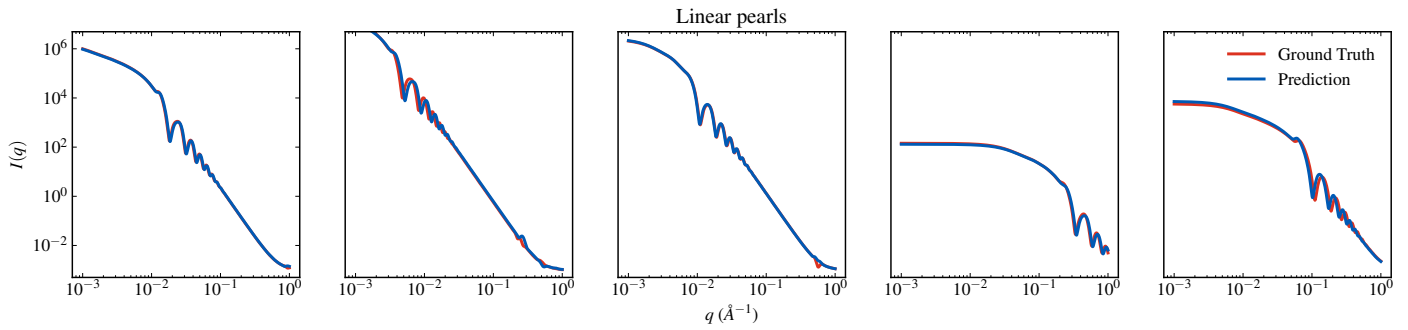

Fig. 25 Comparing predicted and ground-truth linear pearls models. Predicted intensities are constructed from SASformer's predicted scattering-model parameters using the sasmodels Python package.

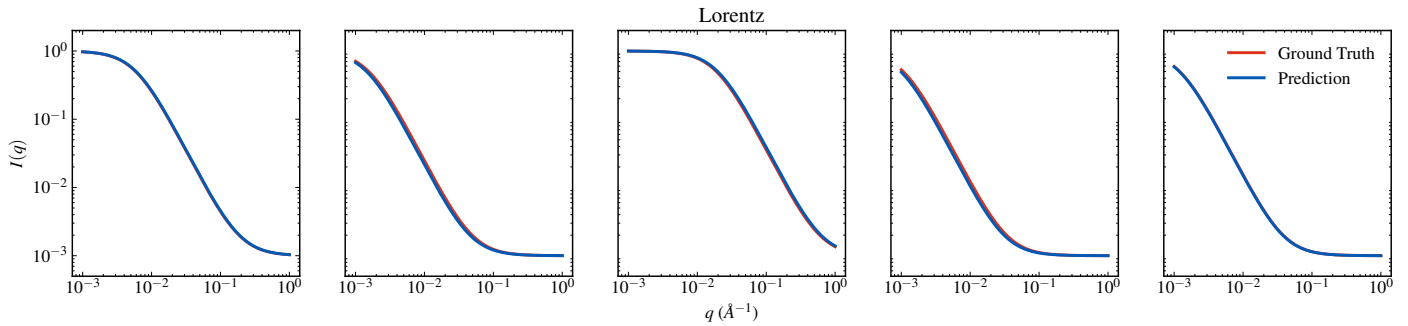

Fig. 26 Comparing predicted and ground-truth lorentz models. Predicted intensities are constructed from SASformer's predicted scattering-model parameters using the sasmodels Python package.

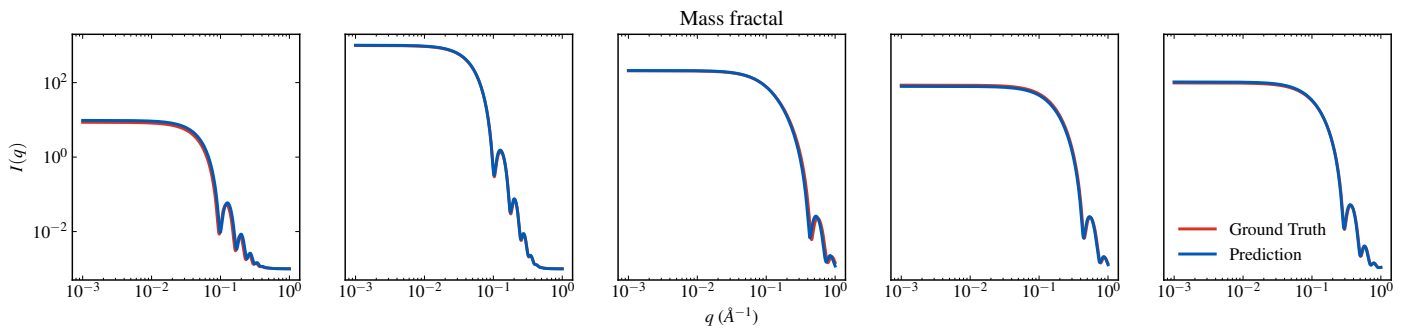

Fig. 27 Comparing predicted and ground-truth mass fractal models. Predicted intensities are constructed from SASformer's predicted scattering-model parameters using the sasmodels Python package.

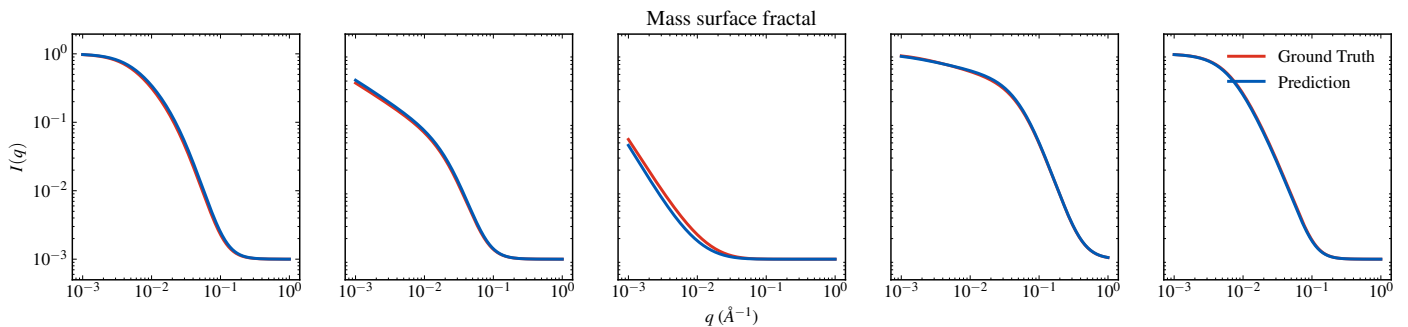

Fig. 28 Comparing predicted and ground-truth mass surface fractal models. Predicted intensities are constructed from SASformer's predicted scattering-model parameters using the sasmodels Python package.

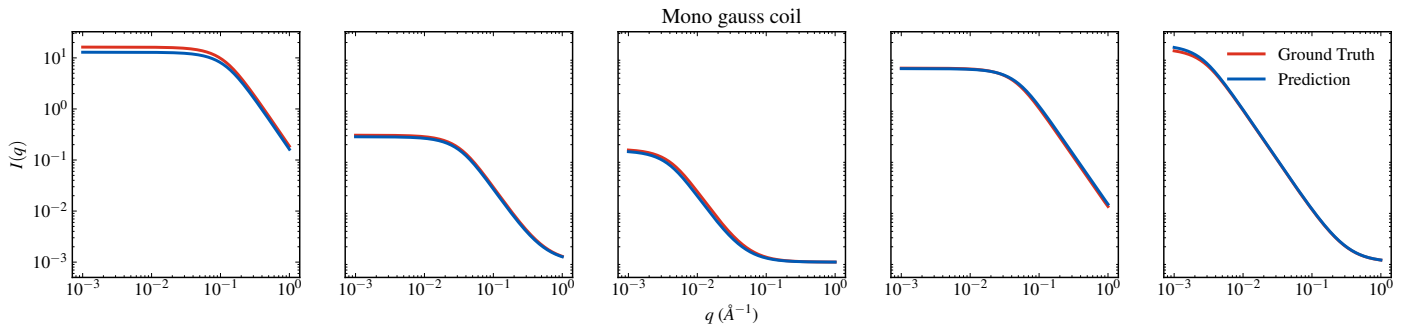

Fig. 29 Comparing predicted and ground-truth mono gauss coil models. Predicted intensities are constructed from SASformer's predicted scattering-model parameters using the sasmodels Python package.

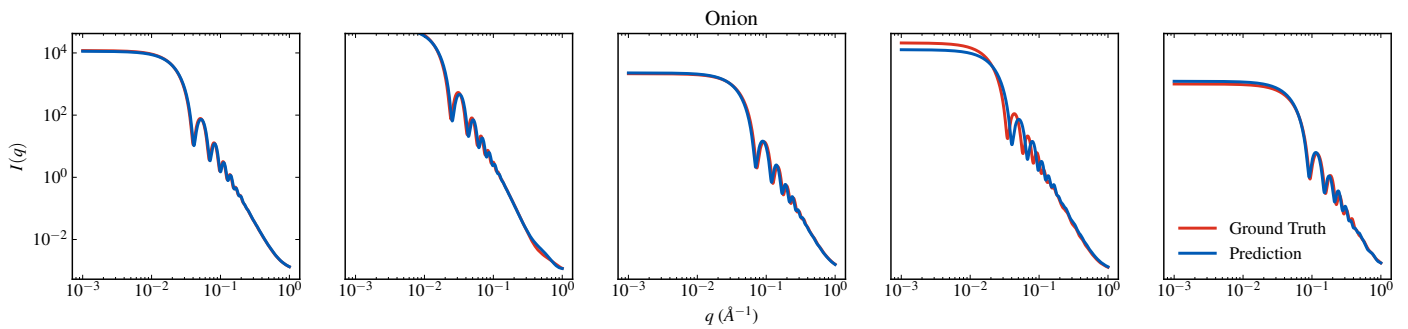

Fig. 30 Comparing predicted and ground-truth onion models. Predicted intensities are constructed from SASformer's predicted scattering-model parameters using the sasmodels Python package.

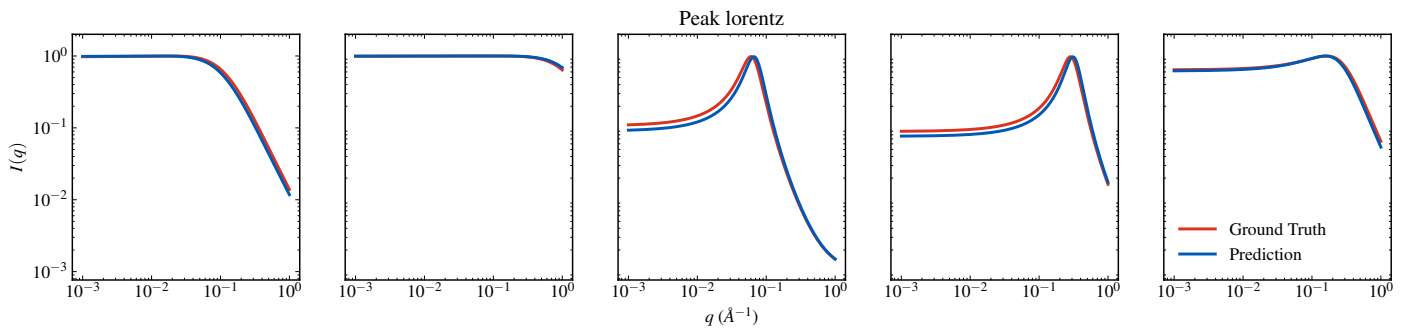

Fig. 31 Comparing predicted and ground-truth peak lorentz models. Predicted intensities are constructed from SASformer's predicted scattering-model parameters using the sasmodels Python package.

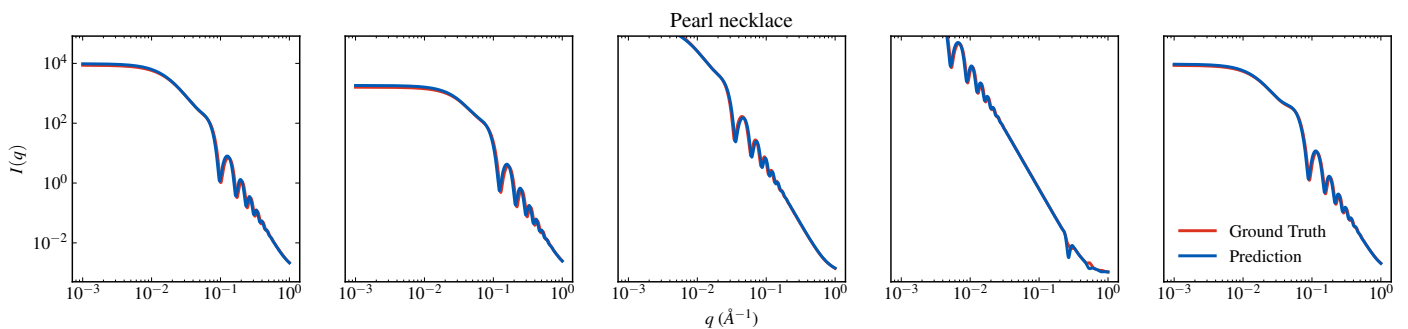

Fig. 32 Comparing predicted and ground-truth pearl necklace models. Predicted intensities are constructed from SASformer's predicted scattering-model parameters using the sasmodels Python package.

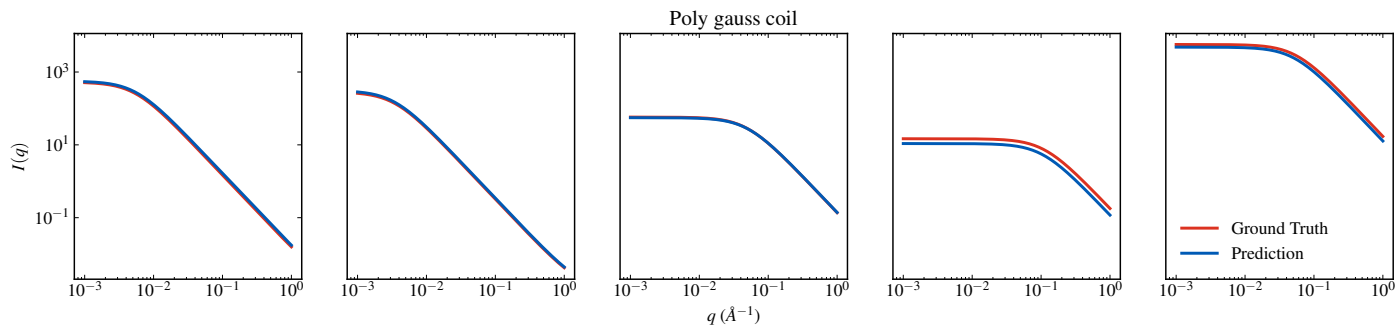

Fig. 33 Comparing predicted and ground-truth poly gauss coil models. Predicted intensities are constructed from SASformer's predicted scattering-model parameters using the sasmodels Python package.

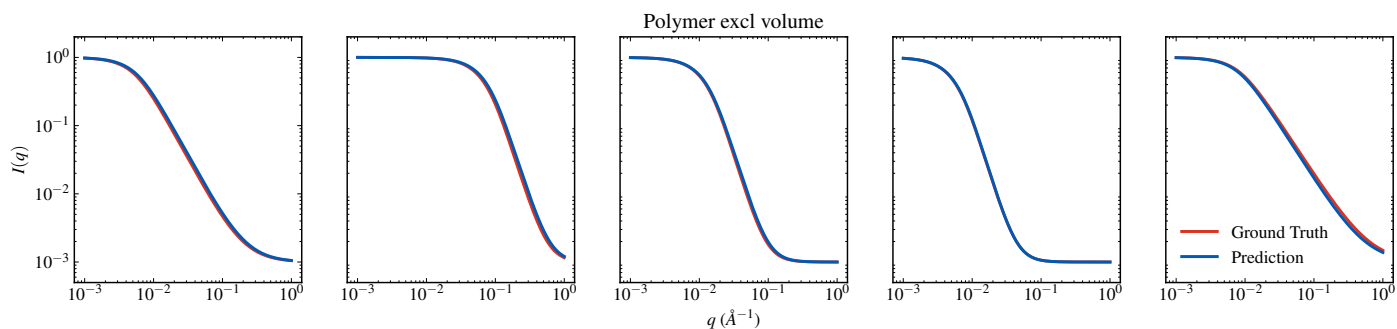

Fig. 34 Comparing predicted and ground-truth polymer excl volume models. Predicted intensities are constructed from SASformer's predicted scattering-model parameters using the sasmodels Python package.

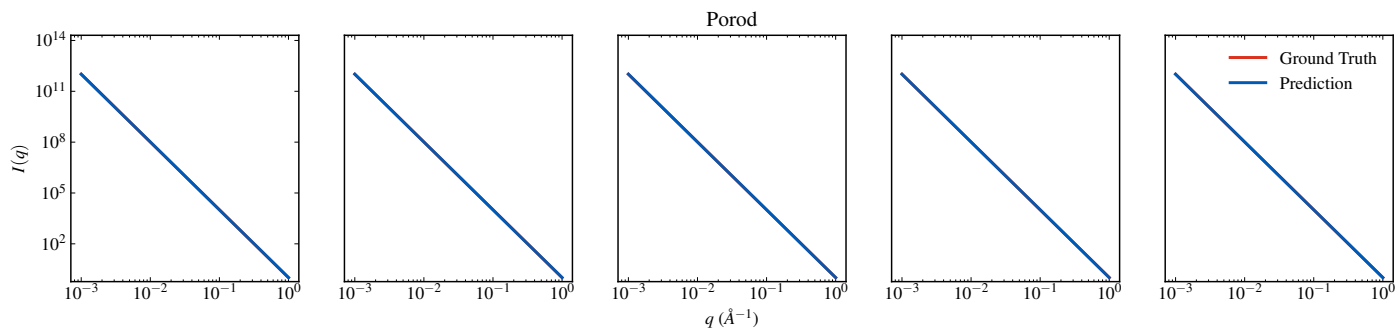

Fig. 35 Comparing predicted and ground-truth porod models. Predicted intensities are constructed from SASformer's predicted scattering-model parameters using the sasmodels Python package.

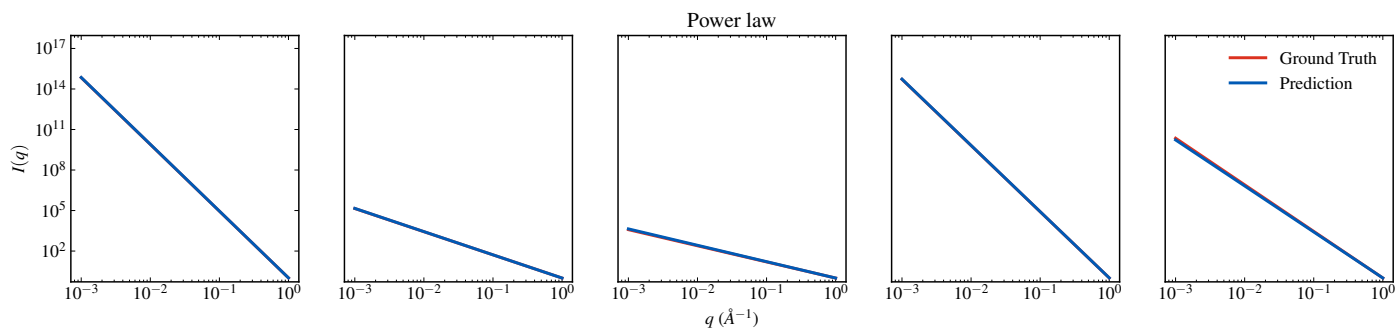

Fig. 36 Comparing predicted and ground-truth power law models. Predicted intensities are constructed from SASformer's predicted scattering-model parameters using the sasmodels Python package.



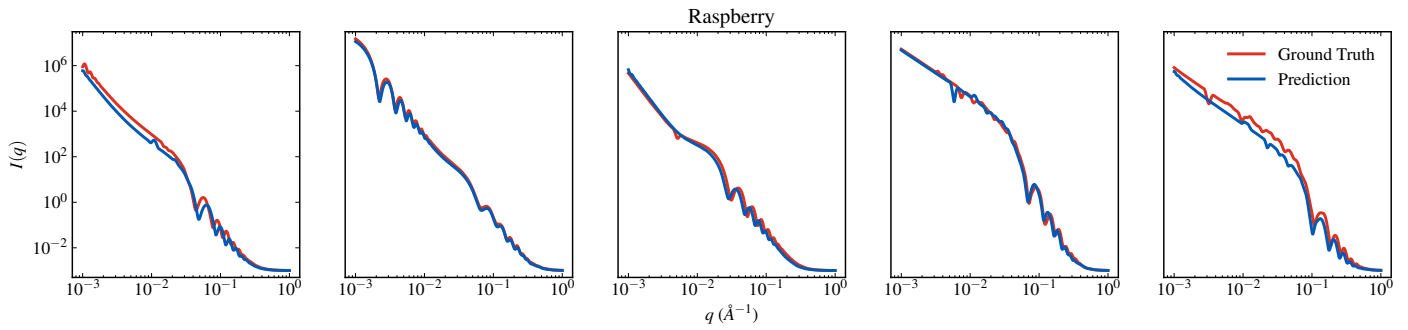

Fig. 37 Comparing predicted and ground-truth raspberry models. Predicted intensities are constructed from SASformer's predicted scattering-model parameters using the sasmodels Python package.

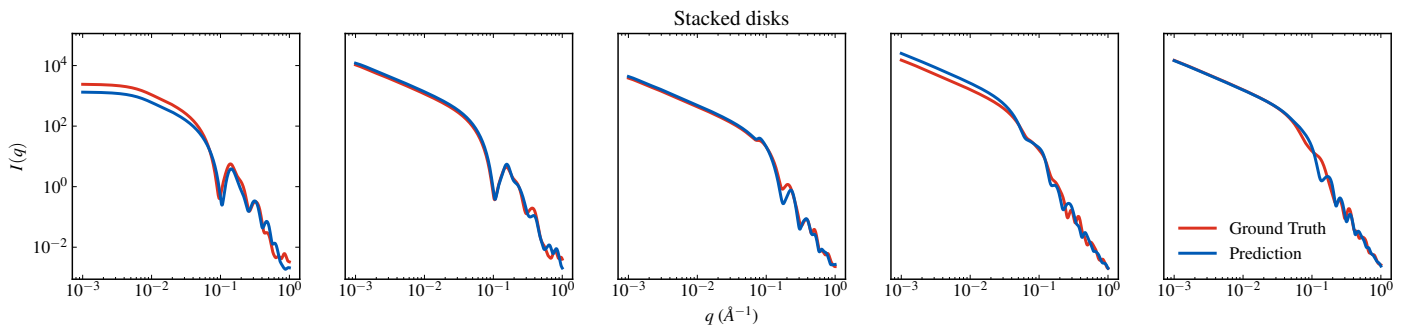

Fig. 38 Comparing predicted and ground-truth stacked disks models. Predicted intensities are constructed from SASformer's predicted scattering-model parameters using the sasmodels Python package.

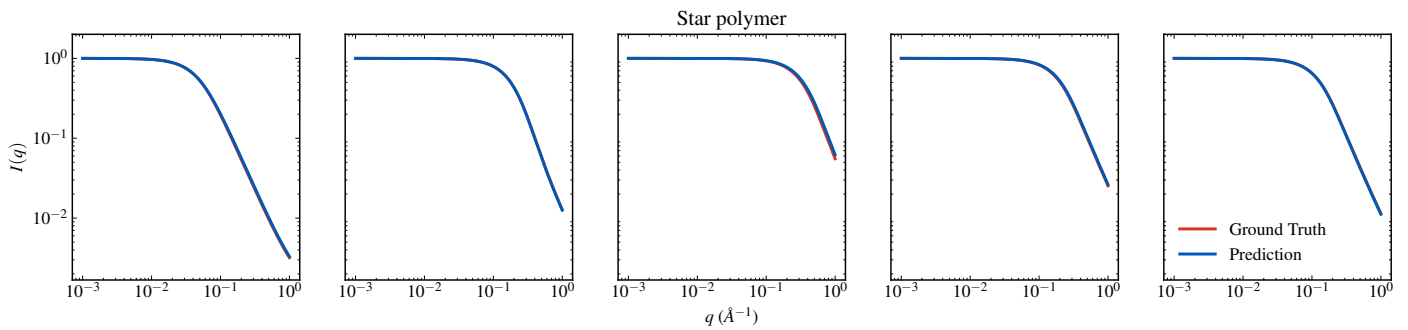

Fig. 39 Comparing predicted and ground-truth star polymer models. Predicted intensities are constructed from SASformer's predicted scattering-model parameters using the sasmodels Python package.

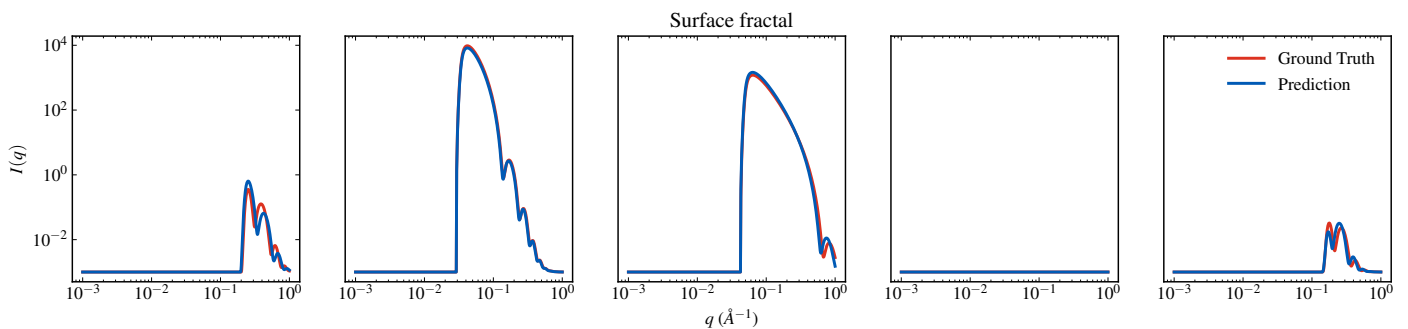

Fig. 40 Comparing predicted and ground-truth surface fractal models. Predicted intensities are constructed from SASformer's predicted scattering-model parameters using the sasmodels Python package.

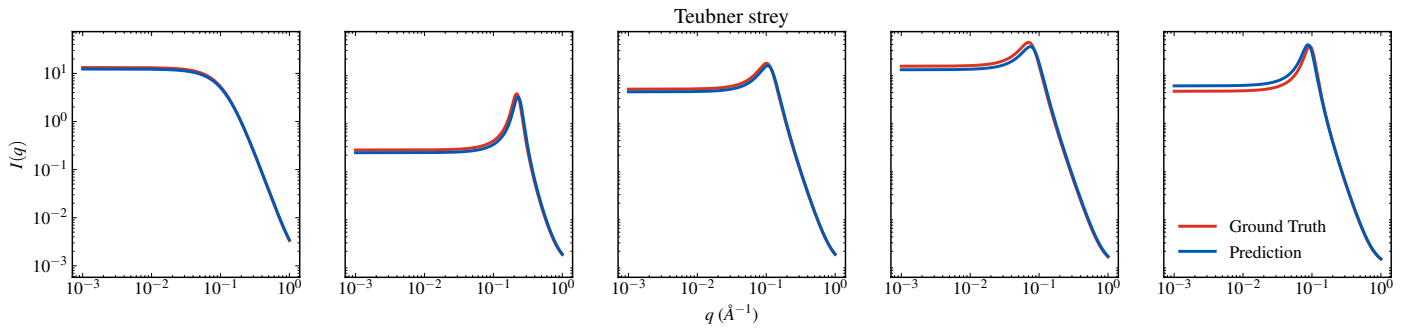

Fig. 41 Comparing predicted and ground-truth teubner strey models. Predicted intensities are constructed from SASformer's predicted scattering-model parameters using the sasmodels Python package.

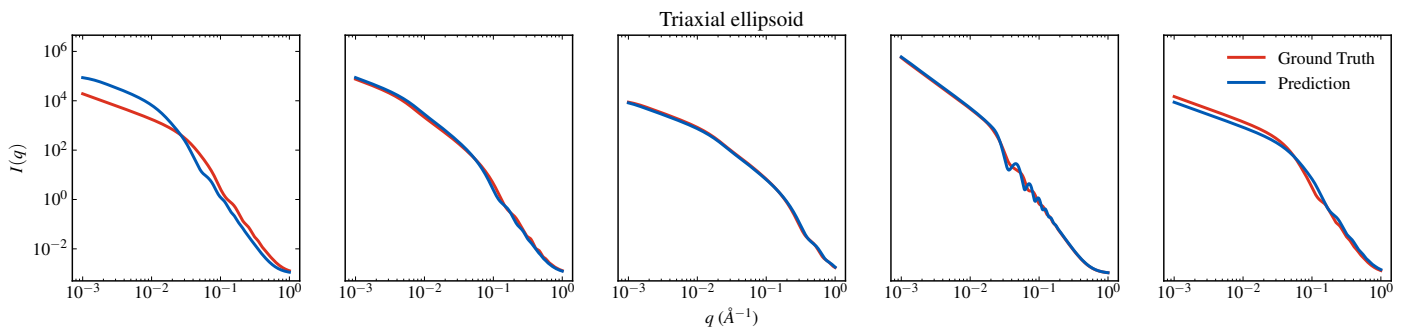

Fig. 42 Comparing predicted and ground-truth triaxial ellipsoid models. Predicted intensities are constructed from SASformer's predicted scattering-model parameters using the sasmodels Python package.

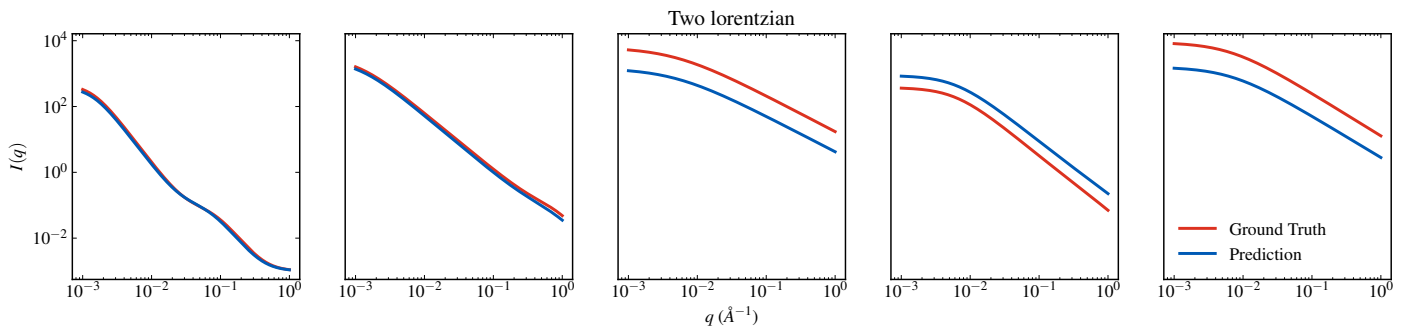

Fig. 43 Comparing predicted and ground-truth two lorentzian models. Predicted intensities are constructed from SASformer's predicted scattering-model parameters using the sasmodels Python package.

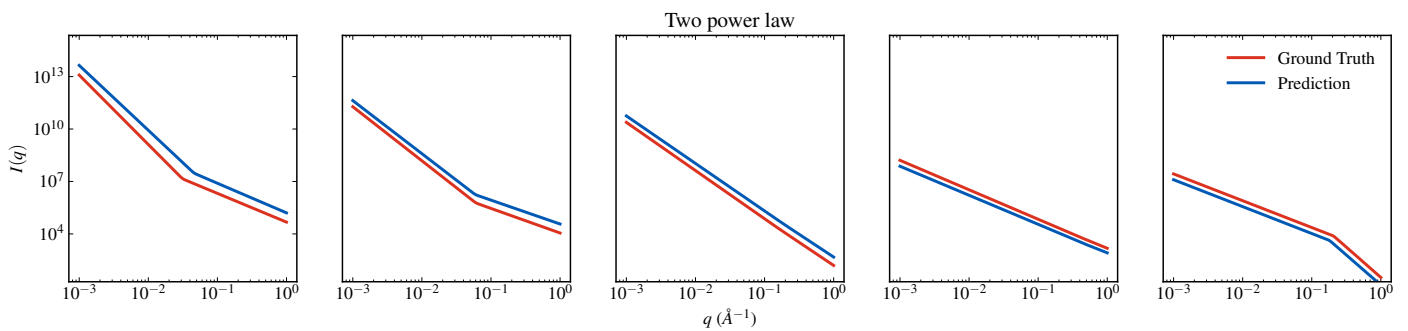

Fig. 44 Comparing predicted and ground-truth two power law models. Predicted intensities are constructed from SASformer's predicted scattering-model parameters using the sasmodels Python package.

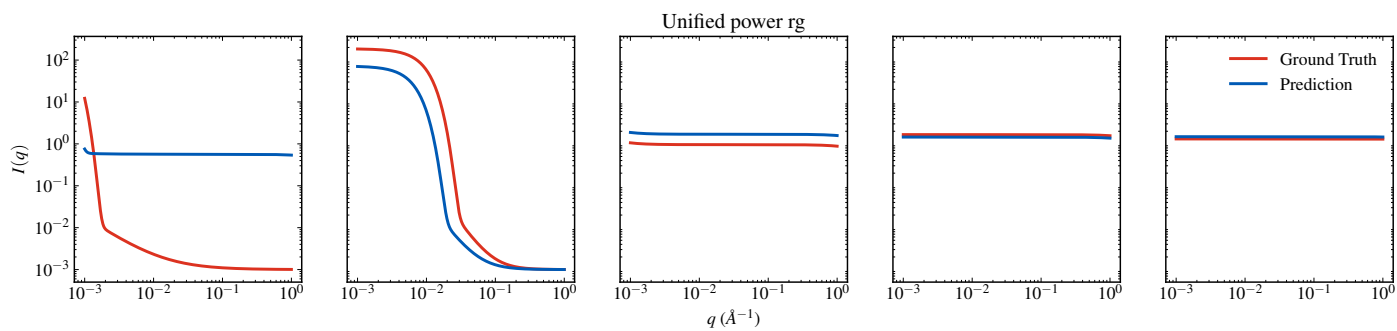

Fig. 45 Comparing predicted and ground-truth unified power Rg models. Predicted intensities are constructed from SASformer's predicted scattering-model parameters using the sasmodels Python package.

## Notes and references

- 1 A. Vaswani, N. Shazeer, N. Parmar, J. Uszkoreit, L. Jones, A. N. Gomez, L. Kaiser and I. Polosukhin, *Computing Research Repository (CoRR)*, 2017, [abs/1706.03762](https://arxiv.org/abs/1706.03762).
- 2 D. P. Kingma and J. Ba, *Adam: A Method for Stochastic Optimization*, 2014, <https://arxiv.org/abs/1412.6980>.
- 3 I. Loshchilov and F. Hutter, *Decoupled Weight Decay Regularization*, 2017, <https://arxiv.org/abs/1711.05101>.
- 4 I. Loshchilov and F. Hutter, *SGDR: Stochastic Gradient Descent with Warm Restarts*, 2016, <https://arxiv.org/abs/1608.03983>.
